# Supplementary material for: Building bio-Profiles for common catalytic reactions
Source: Royal Society of Chemistry journal article supplement (doi:10.1039/d1gc00207d), 2021-01-01
Supplement: d1gc00207d1.pdf [file d1gc00207d1.pdf]

## Building bio-Profiles for common catalytic reactions

Ksenia S. Egorova<sup>\*</sup>, Alexey S. Galushko, Lilya U. Dzhemileva, Vladimir A. D'yakonov, and Valentine P. Ananikov<sup>\*</sup>

N.D. Zelinsky Institute of Organic Chemistry, Russian Academy of Sciences, Leninsky prospect 47, Moscow, Russia 119991

E-mail: egorova-ks@ioc.ac.ru, [val@ioc.ac.ru](mailto:val@ioc.ac.ru)

### Supplementary Information

#### Contents

|                                                                                                                                     |    |
|-------------------------------------------------------------------------------------------------------------------------------------|----|
| Fig. S1. Bio-Profiles for Suzuki and oxidative C-C coupling reactions.....                                                          | 2  |
| Fig. S2. Tox-Profiles for Suzuki and oxidative C-C coupling reactions.....                                                          | 3  |
| Table S1. Synthesis of 1,1'-biphenyl: Method A.....                                                                                 | 4  |
| Table S2. Synthesis of 1,1'-biphenyl: Method B.....                                                                                 | 4  |
| Fig. S3. Bio-Profiles for Friedel-Crafts reaction.....                                                                              | 5  |
| Fig. S4. Tox-Profiles for Friedel-Crafts reaction.....                                                                              | 6  |
| Table S3. Synthesis of ethylbenzene from benzene and bromoethane.....                                                               | 7  |
| Table S4. Synthesis of butylbenzene from benzene and bromobutane.....                                                               | 7  |
| Fig. S5. Bio-Profiles for Heck reaction.....                                                                                        | 8  |
| Fig. S6. Tox-Profiles for Heck reaction.....                                                                                        | 9  |
| Table S5. Synthesis of butyl cinnamate.....                                                                                         | 10 |
| Table S6. Experimental data used for construction of bio-Profiles for 1,1'-biphenyl synthesis.....                                  | 11 |
| Table S7. Experimental data used for construction of bio-Profiles for 1,1'-biphenyl synthesis by using water/surfactant method..... | 18 |
| Fig. S7. Bio-Profiles for routes of synthesis of 1,1'-biphenyl with various catalysts.....                                          | 21 |
| Fig. S8. Bio-Profiles for routes of synthesis of 1,1'-biphenyl with various catalysts.....                                          | 22 |
| Fig. S9. Bio-Profiles for routes of synthesis of 1,1'-biphenyl with various starting materials.....                                 | 23 |
| Fig. S10. Bio-Profiles for routes of synthesis of 1,1'-biphenyl with various starting materials.....                                | 24 |
| Fig. S11. Bio-Profiles for routes of synthesis of 1,1'-biphenyl with various starting materials.....                                | 25 |
| Fig. S12. Bio-Profiles for routes of synthesis of 1,1'-biphenyl with various solvents.....                                          | 26 |
| Fig. S13. Bio-Profiles for routes of synthesis of 1,1'-biphenyl with various solvents.....                                          | 27 |
| Fig. S14. Bio-Profiles for routes of synthesis of 1,1'-biphenyl with various solvents.....                                          | 28 |
| Fig. S15. Bio-Profiles for routes of synthesis of 1,1'-biphenyl with various solvents.....                                          | 29 |
| Fig. S16. Bio-Profiles for routes of synthesis of 1,1'-biphenyl with various solvents.....                                          | 30 |
| Fig. S17. Bio-Profiles for routes of synthesis of 1,1'-biphenyl with various solvents.....                                          | 31 |
| References.....                                                                                                                     | 32 |

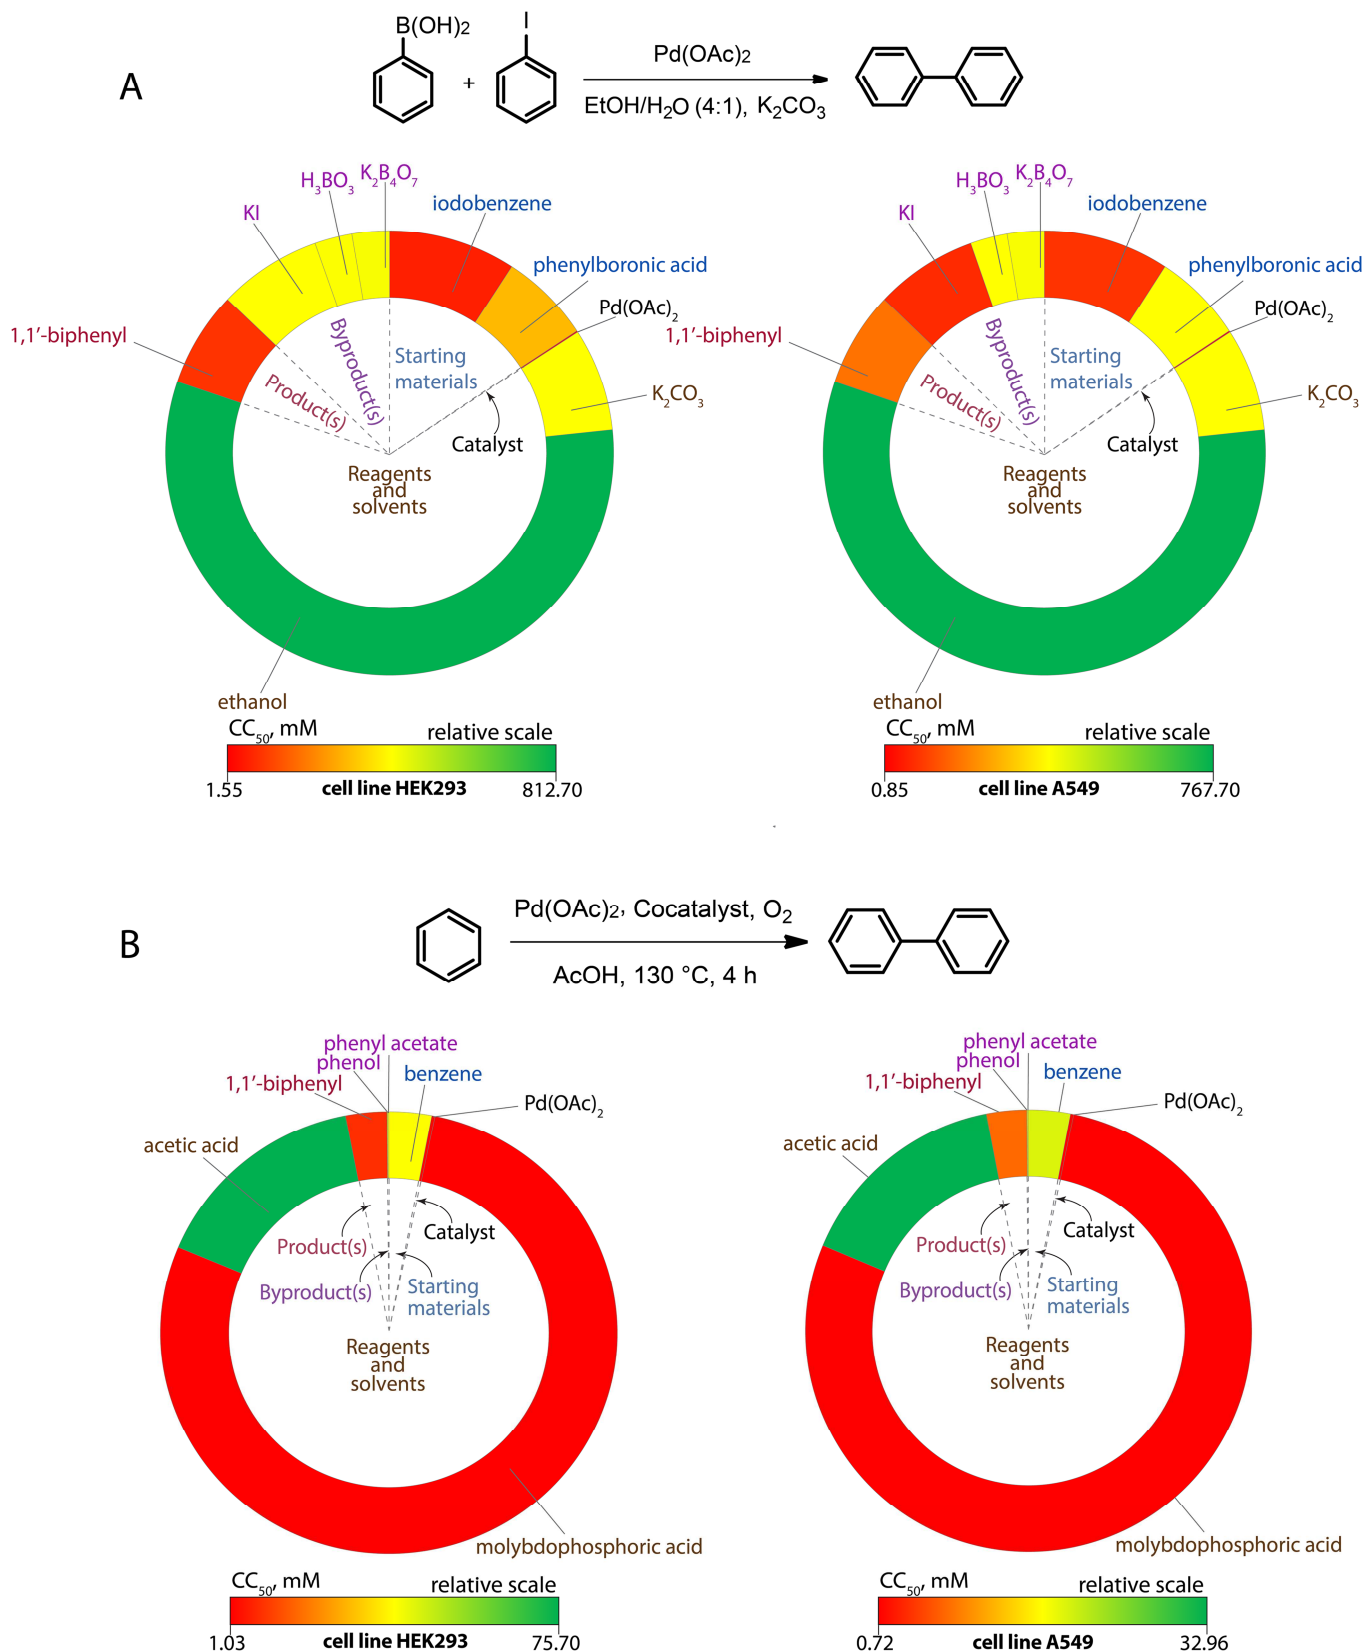

**Fig. S1.** Bio-Profiles for Suzuki and oxidative C-C coupling reactions. Synthesis of 1,1'-biphenyl from (A) iodobenzene and phenylboronic acid, and (B) benzene are used as exemplary reactions. The area of the sectors in the diagrams corresponds to the amounts (g) of the compounds. The color of the sectors corresponds to the actual values of CC<sub>50</sub> of the substances in a given cell line (see the relative cytotoxicity scales under the diagrams; the least toxic substance is shown in green, the most toxic is in red, and the other substances are of intermediate shades of red, orange and yellow). The exact values used for bio-Profiles are provided in Table 1.

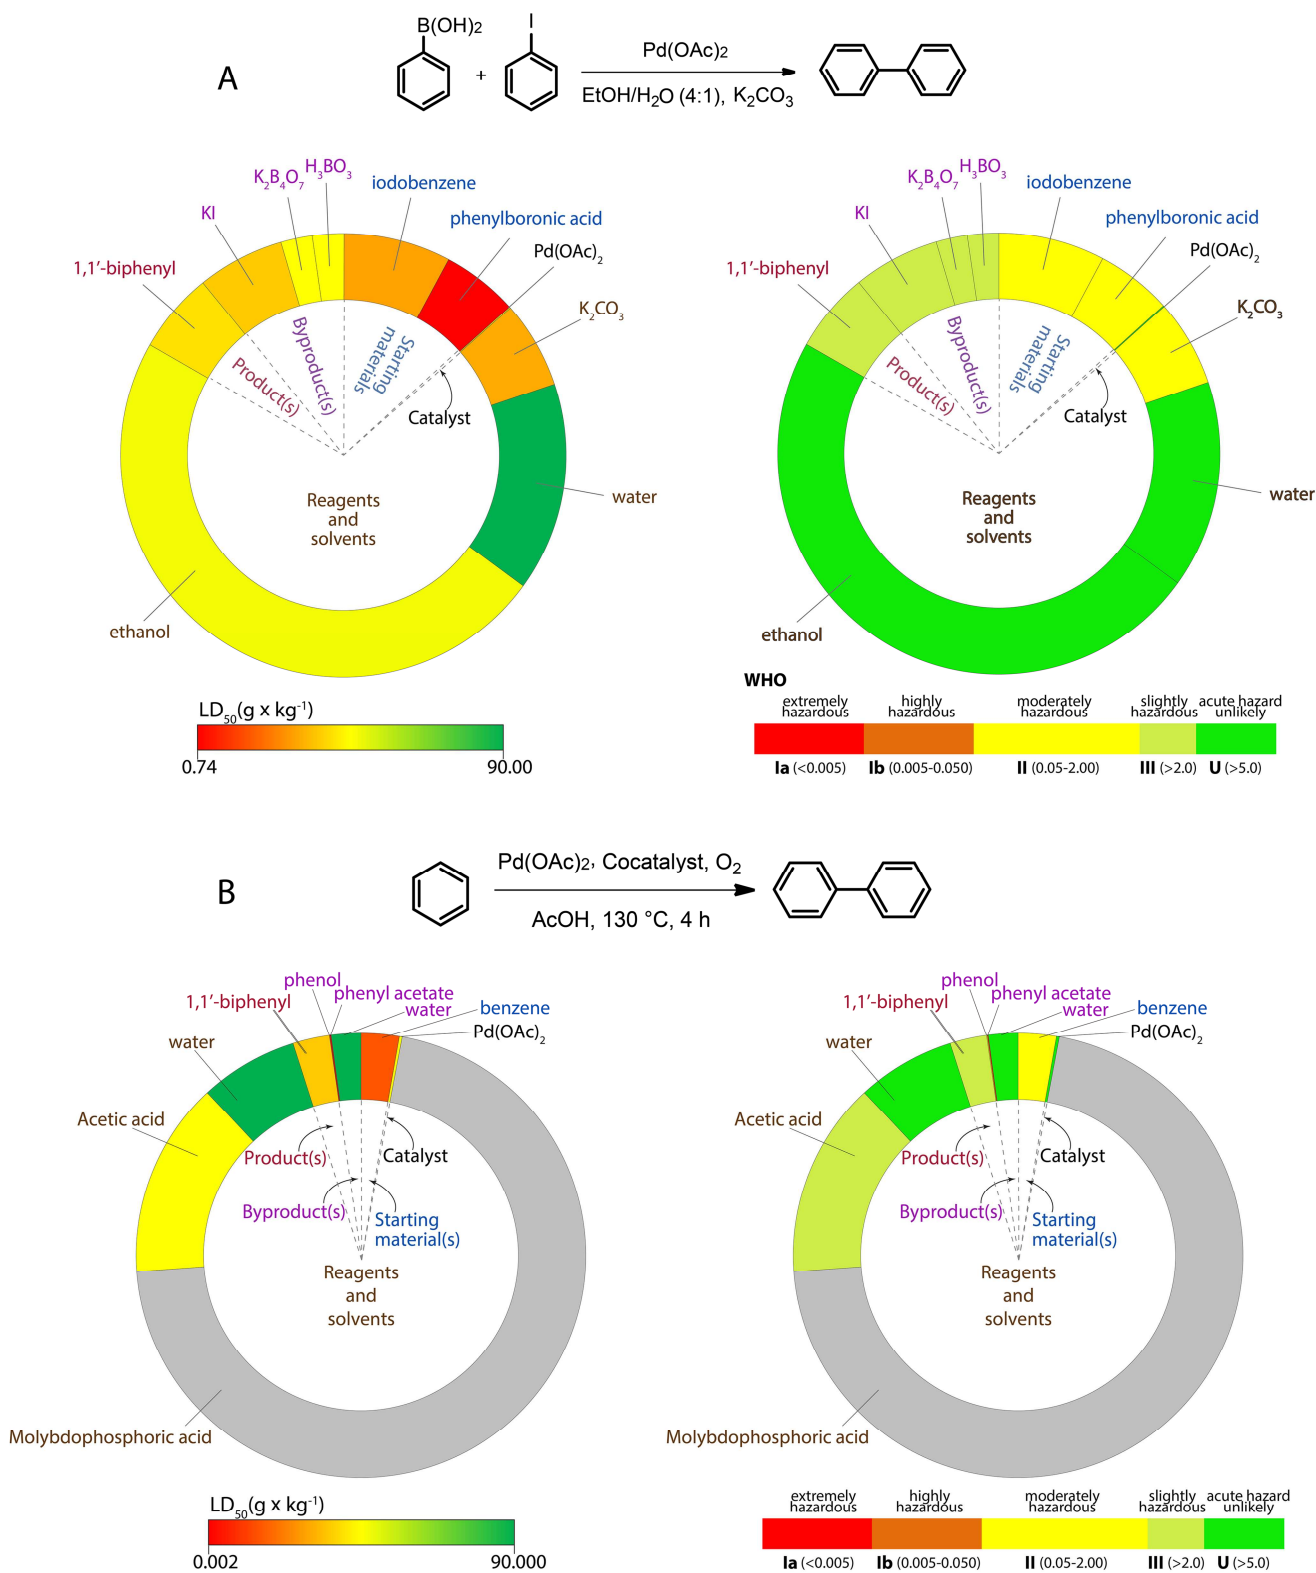

**Fig. S2.** Tox-Profiles for Suzuki and oxidative C-C coupling reactions. Synthesis of 1,1'-biphenyl from (A) iodobenzene and phenylboronic acid, and (B) benzene are used as exemplary reactions. The area of the sectors in the diagrams corresponds to the amounts (g) of the compounds. The color of the sectors corresponds to the actual values of LD<sub>50</sub> (oral, rat) of the substances (left, see the relative toxicity scales under the diagrams; the least toxic substance is shown in green, the most toxic is in red, and the other substances are of intermediate shades of red, orange and yellow) or the WHO toxicity rating (right, see the scales below the diagrams). The gray color corresponds to “no data available”. The exact values used for bio-Profiles are provided in Table S1 and Table S2. Adapted and reproduced with permission from <sup>1</sup>.

**Table S1.** Synthesis of 1,1'-biphenyl: Method A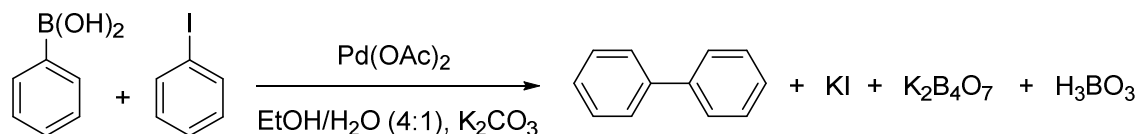

| Substances                                   | LD <sub>50</sub> (oral, rat), g·kg <sup>-1</sup> b.w. | Amount in reaction, g <sup>b</sup> |
|----------------------------------------------|-------------------------------------------------------|------------------------------------|
| <i>Starting materials</i>                    |                                                       |                                    |
| Iodobenzene                                  | 1.749                                                 | 0.2040                             |
| Phenylboronic acid                           | 0.740                                                 | 0.1460                             |
| <i>Reagents, solvents, catalysts</i>         |                                                       |                                    |
| Pd(OAc) <sub>2</sub>                         | >5.100                                                | 0.0022                             |
| K <sub>2</sub> CO <sub>3</sub>               | 1.870                                                 | 0.1660                             |
| Water                                        | >90.000                                               | 0.3990                             |
| Ethanol                                      | 7.060                                                 | 1.2630                             |
| <i>Product(s)</i>                            |                                                       |                                    |
| 1,1'-Biphenyl                                | 2.140                                                 | 0.1540                             |
| <i>Byproduct(s)</i>                          |                                                       |                                    |
| KI                                           | >2.000                                                | <0.1660                            |
| K <sub>2</sub> B <sub>4</sub> O <sub>7</sub> | >2.500 <sup>a</sup>                                   | <0.0600                            |
| H <sub>3</sub> BO <sub>3</sub>               | 2.660                                                 | <0.0600                            |

<sup>a</sup> Data for K<sub>2</sub>B<sub>4</sub>O<sub>7</sub>·4H<sub>2</sub>O.

<sup>b</sup> The product yield is considered as 100%.

**Table S2.** Synthesis of 1,1'-biphenyl: Method B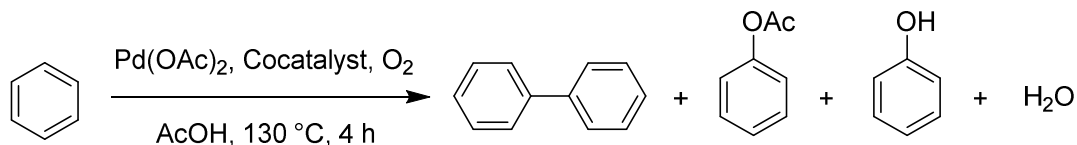

| Substances                           | LD <sub>50</sub> (oral, rat), g·kg <sup>-1</sup> b.w. | Amount in reaction, g <sup>a</sup> |
|--------------------------------------|-------------------------------------------------------|------------------------------------|
| <i>Starting materials</i>            |                                                       |                                    |
| Benzene                              | 0.93000                                               | 0.3861                             |
| <i>Reagents, solvents, catalysts</i> |                                                       |                                    |
| Pd(OAc) <sub>2</sub>                 | >5.10000                                              | 0.0292                             |
| Molybdophosphoric acid               | no data                                               | 10.0000                            |
| Acetic acid                          | 3.31000                                               | 2.0000                             |
| Water                                | >90.00000                                             | 1.0000                             |
| <i>Product(s)</i>                    |                                                       |                                    |
| 1,1'-Biphenyl                        | 2.14000                                               | 0.3727                             |
| <i>Byproduct(s)</i>                  |                                                       |                                    |
| Phenol                               | 0.31700                                               | 0.0075                             |
| Phenyl acetate                       | 0.00163                                               | 0.0095                             |
| Water                                | >90.00000                                             | 0.3000                             |

<sup>a</sup> The conversion is considered as 100%.

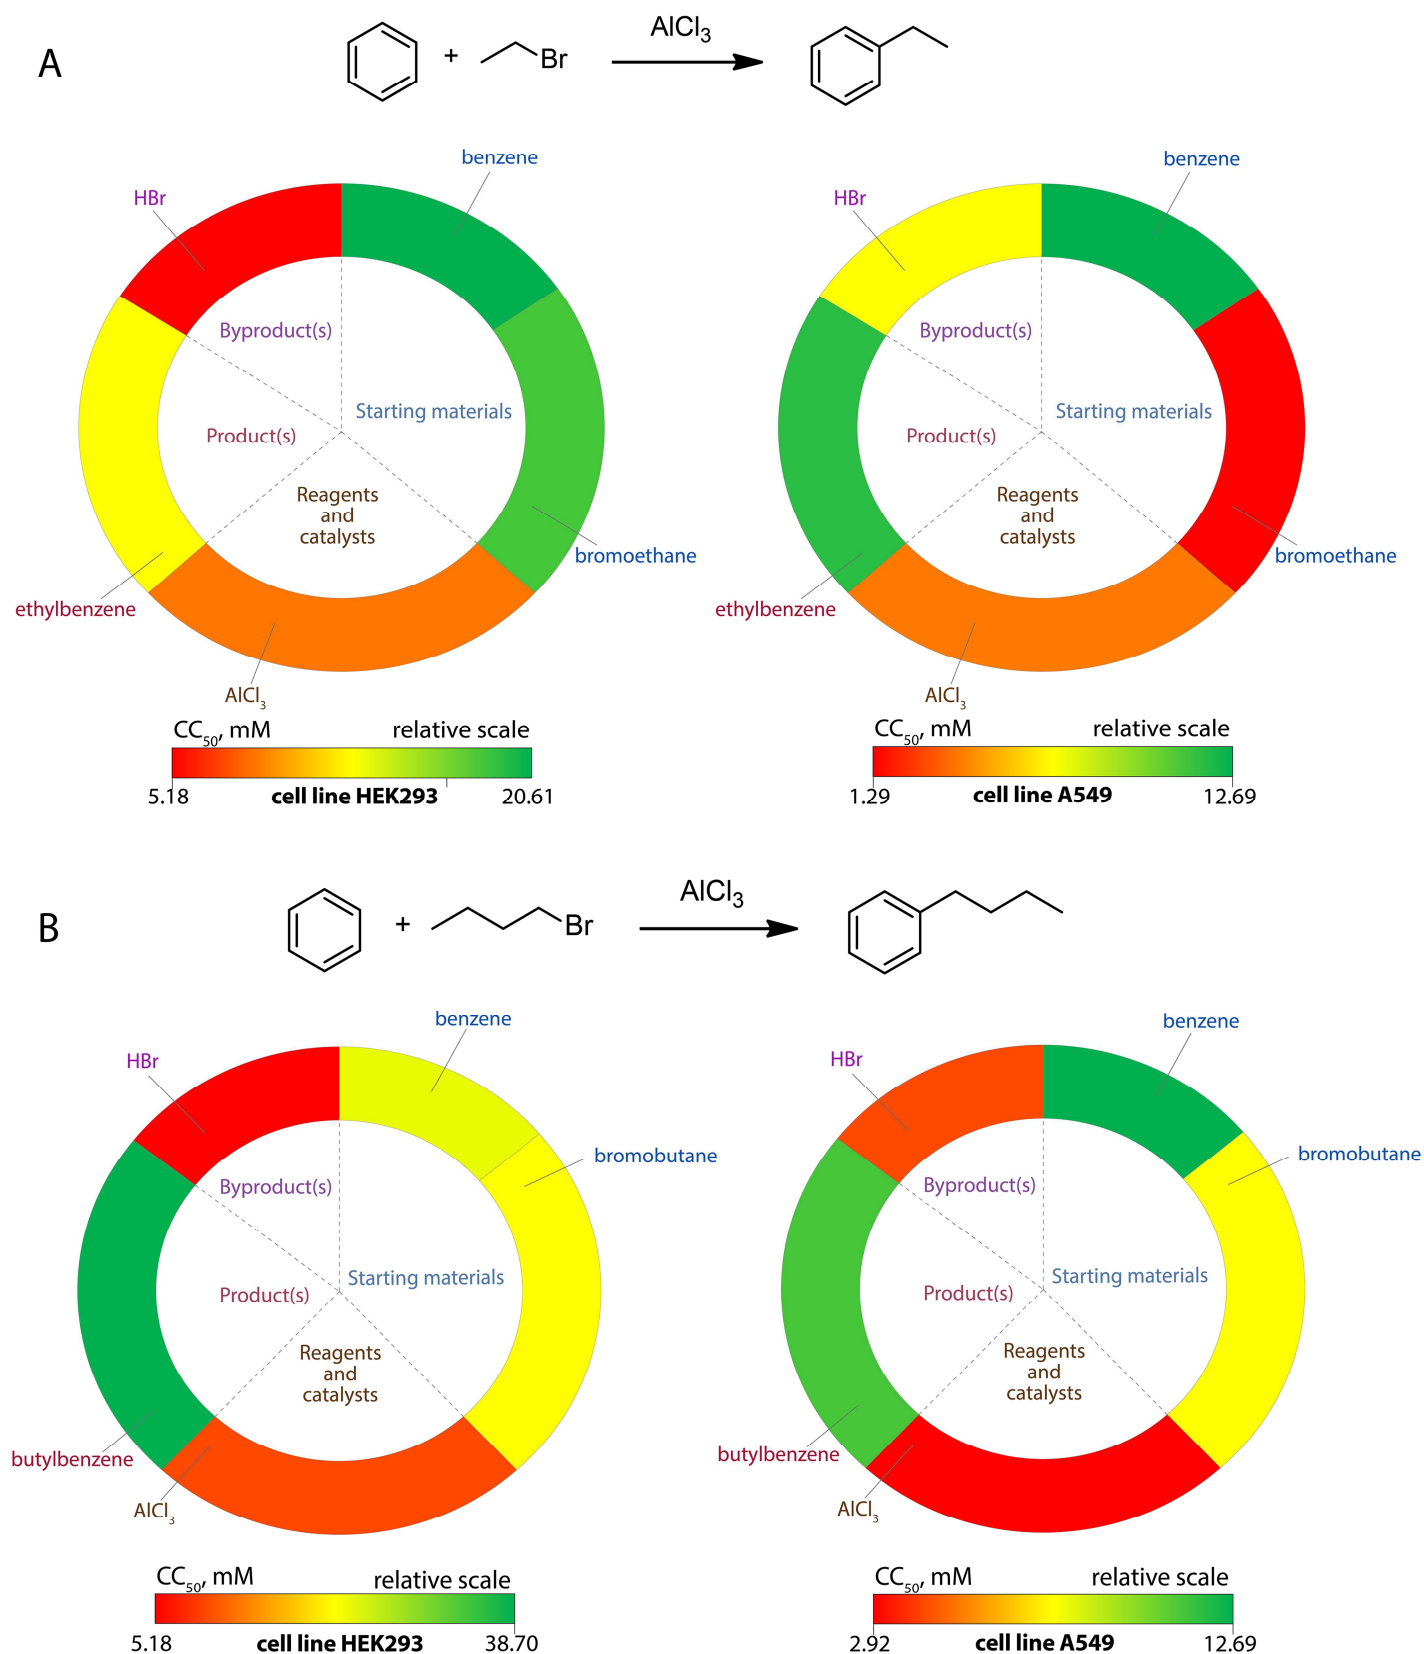

**Fig. S3.** Bio-Profiles for Friedel-Crafts reaction. Syntheses of (A) ethylbenzene from benzene and bromoethane and (B) butylbenzene from benzene and bromobutane are used as exemplary reactions. The area of the sectors in the diagrams corresponds to the amounts (g) of the compounds. The color of the sectors corresponds to the actual values of  $\text{CC}_{50}$  of the substances in a given cell line (see the relative cytotoxicity scales under the diagrams; the least toxic substance is shown in green, the most toxic is in red, and the other substances are of intermediate shades of red, orange and yellow). The exact values used for bio-Profiles are provided in Table 2.

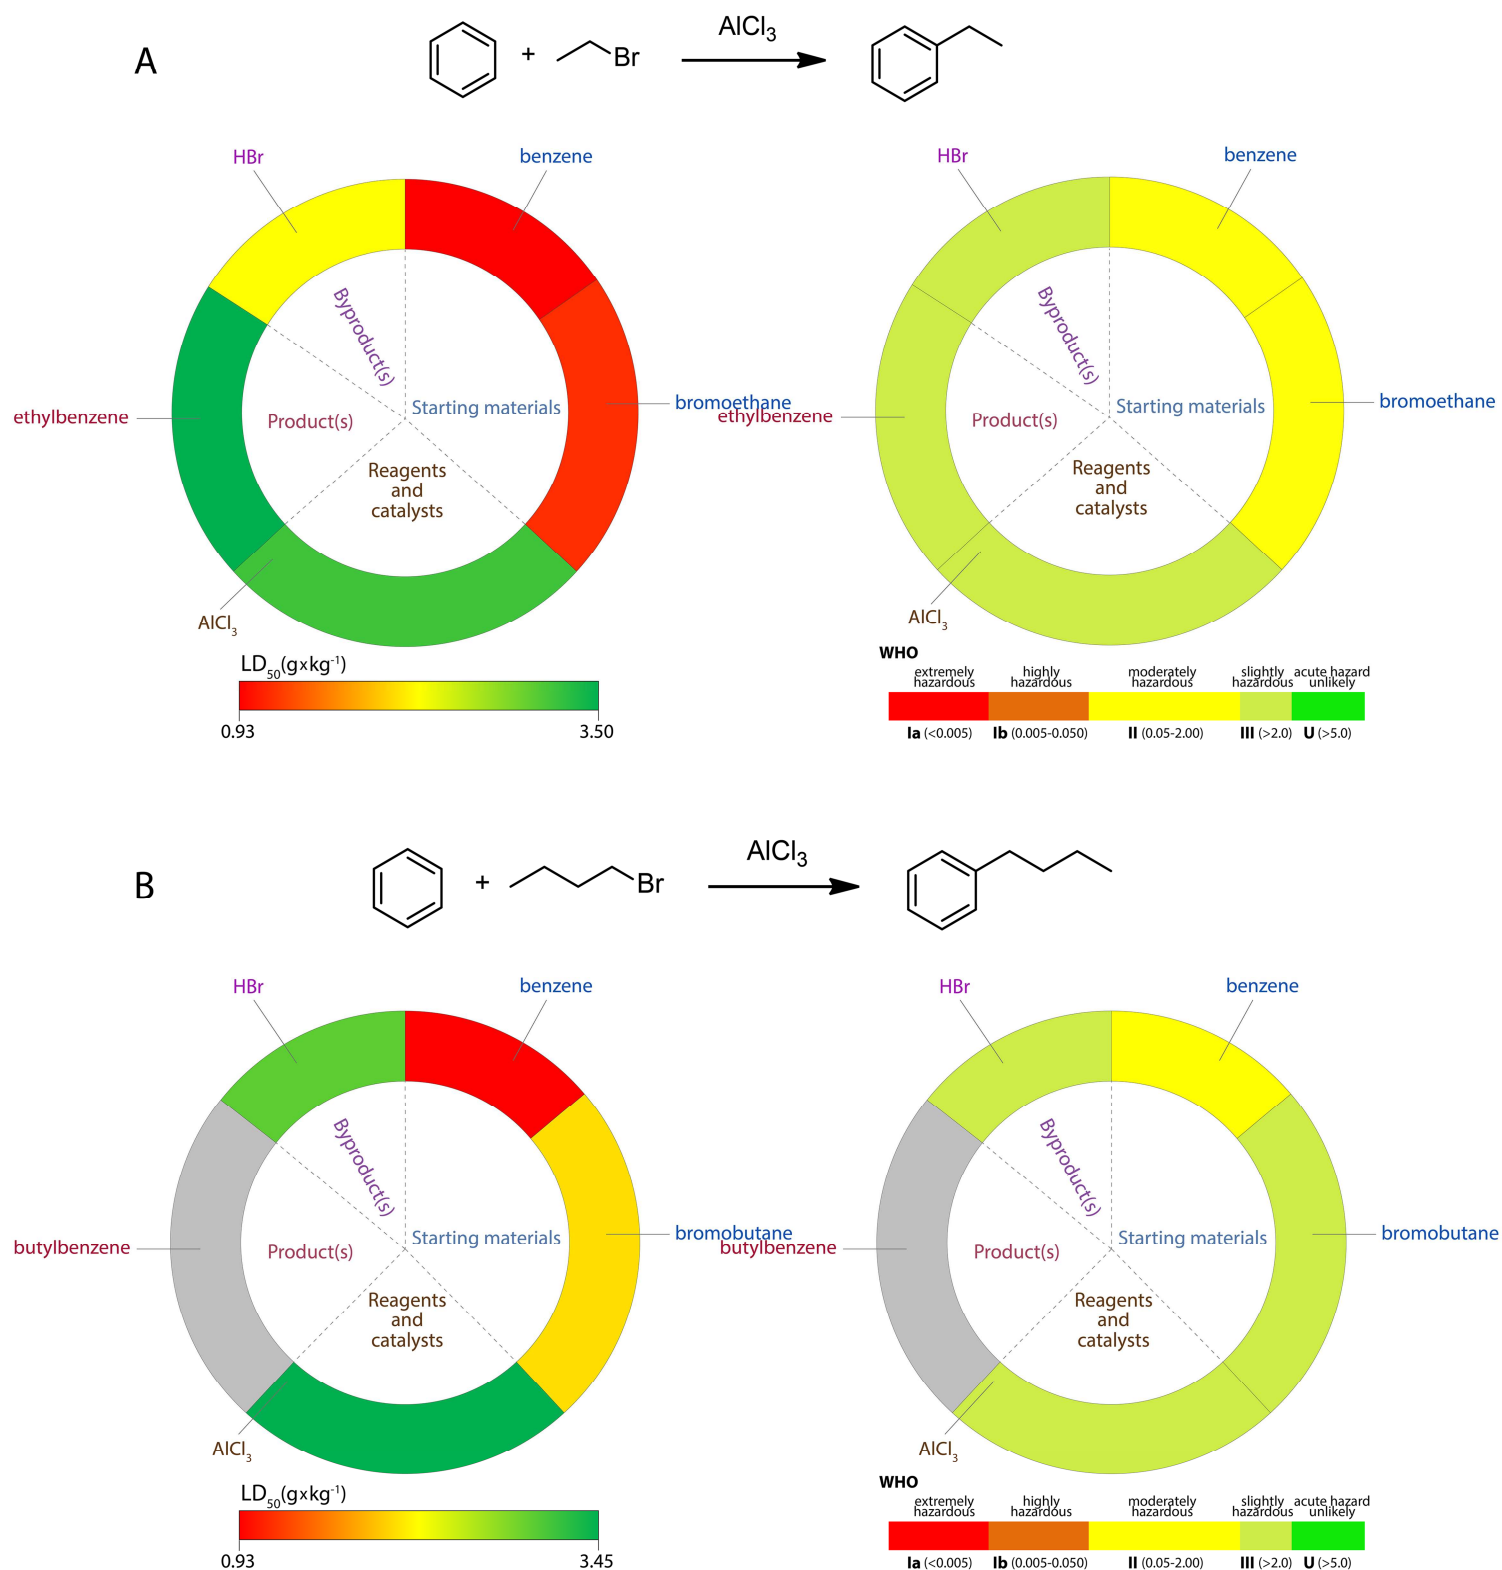

**Fig. S4.** Tox-Profiles for Friedel-Crafts reaction. Syntheses of (A) ethylbenzene from benzene and bromoethane and (B) butylbenzene from benzene and bromobutane are used as exemplary reactions. The area of the sectors in the diagrams corresponds to the amounts (g) of the compounds. The color of the sectors corresponds to the actual values of LD<sub>50</sub> (oral, rat) of the substances (left, see the relative toxicity scales under the diagrams; the least toxic substance is shown in green, the most toxic is in red, and the other substances are of intermediate shades of red, orange and yellow) or the WHO toxicity rating (right, see the scales below the diagrams). The gray color corresponds to “no data available”. The exact values used for bio-Profiles are provided in Table S3 and Table S4. (A) is adapted and reproduced with permission from <sup>1</sup>.

**Table S3.** Synthesis of ethylbenzene from benzene and bromoethane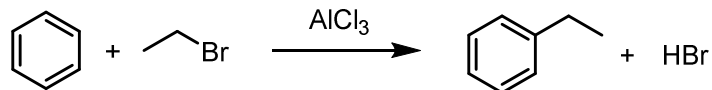

| Substances                           | LD <sub>50</sub> (oral, rat), g·kg <sup>-1</sup> b.w. | Amount in reaction, g <sup>a</sup> |
|--------------------------------------|-------------------------------------------------------|------------------------------------|
| <i>Starting materials</i>            |                                                       |                                    |
| Benzene                              | 0.93                                                  | 0.0780                             |
| Bromoethane                          | 1.35                                                  | 0.1090                             |
| <i>Reagents, solvents, catalysts</i> |                                                       |                                    |
| AlCl <sub>3</sub>                    | 3.45                                                  | 0.1335                             |
| <i>Product(s)</i>                    |                                                       |                                    |
| Ethylbenzene                         | 3.50                                                  | 0.1060                             |
| <i>Byproduct(s)</i>                  |                                                       |                                    |
| HBr                                  | 3.30                                                  | 0.0810                             |

<sup>a</sup> The product yield is considered as 100%.

**Table S4.** Synthesis of butylbenzene from benzene and bromobutane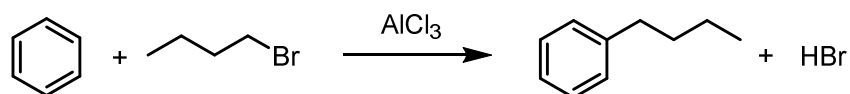

| Substances                           | LD <sub>50</sub> (oral, rat), g·kg <sup>-1</sup> b.w. | Amount in reaction, g <sup>a</sup> |
|--------------------------------------|-------------------------------------------------------|------------------------------------|
| <i>Starting materials</i>            |                                                       |                                    |
| Benzene                              | 0.930                                                 | 0.0780                             |
| Bromobutane                          | 2.761                                                 | 0.1370                             |
| <i>Reagents, solvents, catalysts</i> |                                                       |                                    |
| AlCl <sub>3</sub>                    | 3.450                                                 | 0.1335                             |
| <i>Product(s)</i>                    |                                                       |                                    |
| Butylbenzene                         | no data                                               | 0.1340                             |
| <i>Byproduct(s)</i>                  |                                                       |                                    |
| HBr                                  | 3.300                                                 | 0.0810                             |

<sup>a</sup> The product yield is considered as 100%.

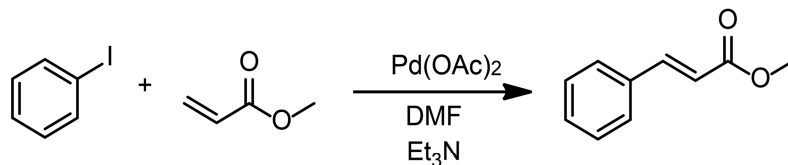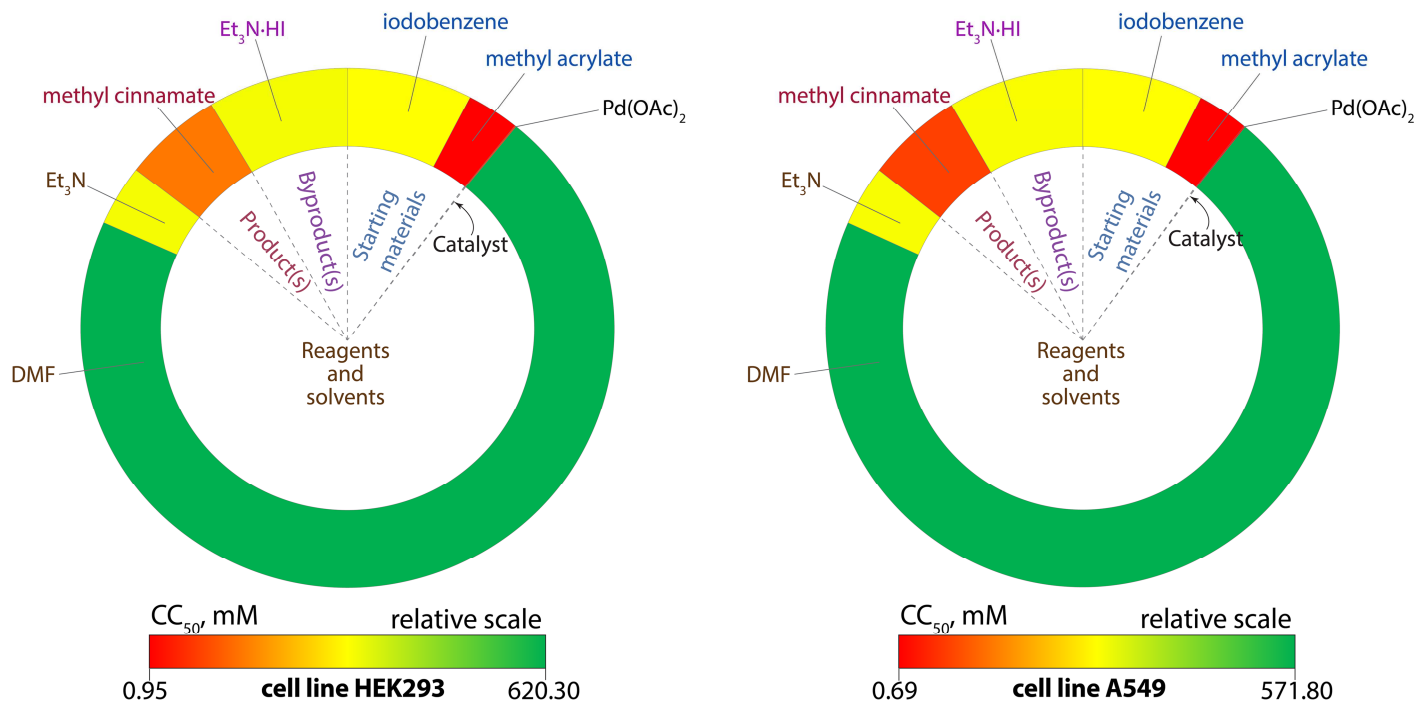

**Fig. S5.** Bio-Profiles for Heck reaction. Synthesis of methyl cinnamate from iodobenzene and methyl acrylate is used as an exemplary reaction. The area of the sectors in the diagrams corresponds to the amounts (g) of the compounds. The color of the sectors corresponds to the actual values of  $CC_{50}$  of the substances in a given cell line (see the relative cytotoxicity scales under the diagrams; the least toxic substance is shown in green, the most toxic is in red, and the other substances are of intermediate shades of red, orange and yellow). The exact values used for bio-Profiles are provided in Table 3.



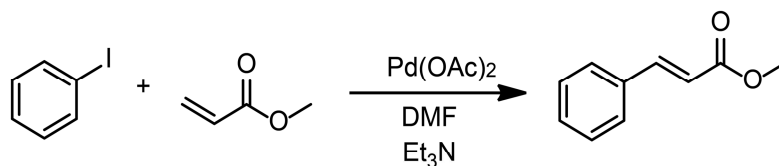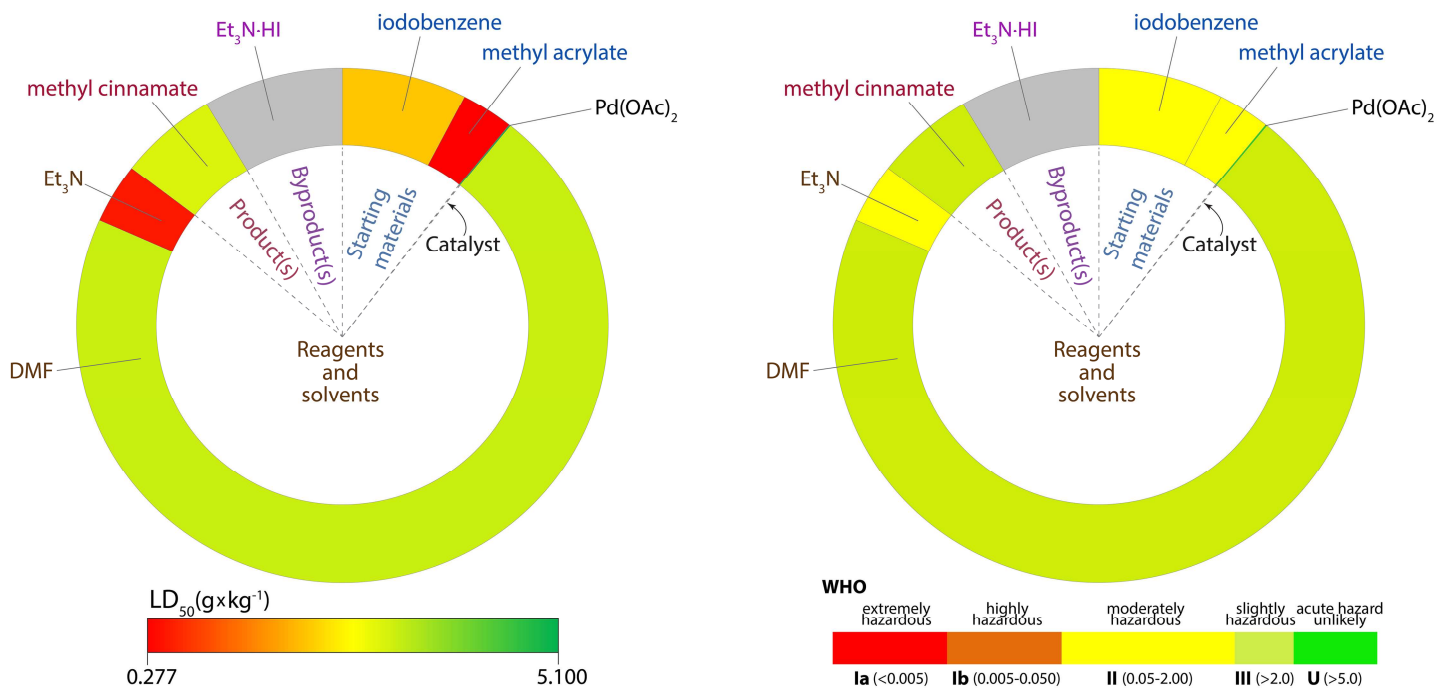

**Fig. S6.** Tox-Profiles for Heck reaction. Synthesis of methyl cinnamate from iodobenzene and methyl acrylate is used as an exemplary reaction. The area of the sectors in the diagrams corresponds to the amounts (g) of the compounds. The color of the sectors corresponds to the actual values of LD<sub>50</sub> (oral, rat) of the substances (left, see the relative toxicity scales under the diagrams; the least toxic substance is shown in green, the most toxic is in red, and the other substances are of intermediate shades of red, orange and yellow) or the WHO toxicity rating (right, see the scales below the diagrams). The gray color corresponds to “no data available”. The exact values used for bio-Profiles are provided in Table S5.

**Table S5.** Synthesis of butyl cinnamate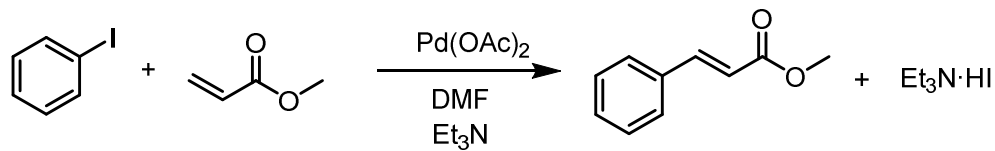

| Substances                           | LD <sub>50</sub> (oral, rat), g·kg <sup>-1</sup> b.w. | Amount in reaction, g <sup>a</sup> |
|--------------------------------------|-------------------------------------------------------|------------------------------------|
| <i>Starting materials</i>            |                                                       |                                    |
| Iodobenzene                          | 1.749                                                 | 0.2040                             |
| Methyl acrylate                      | 0.277                                                 | 0.0860                             |
| <i>Reagents, solvents, catalysts</i> |                                                       |                                    |
| Pd(OAc) <sub>2</sub>                 | >5.100                                                | 0.0022                             |
| Dimethylformamide                    | 2.800                                                 | 1.9000                             |
| Triethylamine                        | 0.460                                                 | 0.1010                             |
| <i>Product(s)</i>                    |                                                       |                                    |
| Methyl cinnamate                     | 2.610                                                 | 0.1620                             |
| <i>Byproduct(s)</i>                  |                                                       |                                    |
| Triethylamine hydroiodide            | no data                                               | 0.2290                             |

<sup>a</sup> The product yield is considered as 100%.

**Table S6.** Experimental data used for construction of bio-Profiles for 1,1'-biphenyl synthesis

| Substances                                   | Amount in reaction |       | HEK293                                  |                | A549                                    |                |
|----------------------------------------------|--------------------|-------|-----------------------------------------|----------------|-----------------------------------------|----------------|
|                                              | g                  | mmol  | 24-h CC <sub>50</sub> , mM <sup>b</sup> | NC             | 24-h CC <sub>50</sub> , mM <sup>b</sup> | NC             |
| <b>Reaction A-A-A<sup>a</sup></b>            |                    |       |                                         |                |                                         |                |
| <i>Starting materials</i>                    |                    |       |                                         |                |                                         |                |
| Iodobenzene                                  | 0.2040             | 1.00  | 3.37 (3.06-3.68)                        | 0.297          | 2.39 (2.18-2.60)                        | 0.418          |
| Phenylboronic acid                           | 0.1460             | 1.20  | 12.14 (11.08-13.20)                     | 0.099          | 8.45 (7.69-9.21)                        | 0.142          |
| <i>Reagents, solvents, catalysts</i>         |                    |       |                                         |                |                                         |                |
| Pd(OAc) <sub>2</sub>                         | 0.0022             | 0.01  | 1.55 (1.43-1.67)                        | 0.006          | 0.85 (0.76-0.94)                        | 0.012          |
| K <sub>2</sub> CO <sub>3</sub>               | 0.1660             | 1.20  | 20.89 (19.63-22.15)                     | 0.057          | 10.49 (9.51-11.47)                      | 0.115          |
| Water                                        | 0.3990             | 22.15 | - <sup>c</sup>                          | - <sup>c</sup> | - <sup>c</sup>                          | - <sup>c</sup> |
| Ethanol                                      | 1.2630             | 27.41 | 812.70 (797.02-828.38)                  | 0.034          | 767.70 (749.11-786.29)                  | 0.036          |
| <i>Product(s)</i>                            |                    |       |                                         |                |                                         |                |
| 1,1'-Biphenyl                                | 0.1540             | 1.00  | 4.50 (4.03-4.97)                        | 0.222          | 4.26 (3.68-4.84)                        | 0.234          |
| <i>Byproduct(s)</i>                          |                    |       |                                         |                |                                         |                |
| KI                                           | 0.1660             | 1.00  | 16.08 (15.27-16.89)                     | 0.062          | 2.11 (1.74-2.48)                        | 0.474          |
| K <sub>2</sub> B <sub>4</sub> O <sub>7</sub> | 0.0600             | 0.26  | 38.50 (36.96-40.04) <sup>d</sup>        | 0.007          | 31.24 (30.12-32.36) <sup>d</sup>        | 0.008          |
| H <sub>3</sub> BO <sub>3</sub>               | 0.0600             | 0.97  | 27.70 (26.25-29.15)                     | 0.035          | 10.24 (9.26-11.22)                      | 0.095          |
| <b>bio-Factor</b>                            |                    |       | <b>0.74</b>                             |                | <b>1.19</b>                             |                |
| <b>Reaction A-B-A<sup>a</sup></b>            |                    |       |                                         |                |                                         |                |
| <i>Starting materials</i>                    |                    |       |                                         |                |                                         |                |
| Iodobenzene                                  | 0.2040             | 1.00  | 3.37 (3.06-3.68)                        | 0.297          | 2.39 (2.18-2.60)                        | 0.418          |
| Phenylboronic acid                           | 0.1460             | 1.20  | 12.14 (11.08-13.20)                     | 0.099          | 8.45 (7.69-9.21)                        | 0.142          |
| <i>Reagents, solvents, catalysts</i>         |                    |       |                                         |                |                                         |                |
| PdCl <sub>2</sub>                            | 0.0018             | 0.01  | 1.72 (1.55-1.89)                        | 0.006          | 1.23 (1.10-1.36)                        | 0.008          |
| K <sub>2</sub> CO <sub>3</sub>               | 0.1660             | 1.20  | 20.89 (19.63-22.15)                     | 0.057          | 10.49 (9.51-11.47)                      | 0.115          |
| Water                                        | 0.3990             | 22.15 | - <sup>c</sup>                          | - <sup>c</sup> | - <sup>c</sup>                          | - <sup>c</sup> |
| Ethanol                                      | 1.2630             | 27.41 | 812.70 (797.02-828.38)                  | 0.034          | 767.70 (749.11-786.29)                  | 0.036          |
| <i>Product(s)</i>                            |                    |       |                                         |                |                                         |                |
| 1,1'-Biphenyl                                | 0.1540             | 1.00  | 4.50 (4.03-4.97)                        | 0.222          | 4.26 (3.68-4.84)                        | 0.234          |
| <i>Byproduct(s)</i>                          |                    |       |                                         |                |                                         |                |
| KI                                           | 0.1660             | 1.00  | 16.08 (15.27-16.89)                     | 0.062          | 2.11 (1.74-2.48)                        | 0.474          |
| K <sub>2</sub> B <sub>4</sub> O <sub>7</sub> | 0.0600             | 0.26  | 38.50 (36.96-40.04) <sup>d</sup>        | 0.007          | 31.24 (30.12-32.36) <sup>d</sup>        | 0.008          |
| H <sub>3</sub> BO <sub>3</sub>               | 0.0600             | 0.97  | 27.70 (26.25-29.15)                     | 0.035          | 10.24 (9.26-11.22)                      | 0.095          |
| <b>bio-Factor</b>                            |                    |       | <b>0.74</b>                             |                | <b>1.19</b>                             |                |
| <b>Reaction A-C-A<sup>a</sup></b>            |                    |       |                                         |                |                                         |                |
| <i>Starting materials</i>                    |                    |       |                                         |                |                                         |                |
| Iodobenzene                                  | 0.2040             | 1.00  | 3.37 (3.06-3.68)                        | 0.297          | 2.39 (2.18-2.60)                        | 0.418          |
| Phenylboronic acid                           | 0.1460             | 1.20  | 12.14 (11.08-13.20)                     | 0.099          | 8.45 (7.69-9.21)                        | 0.142          |
| <i>Reagents, solvents, catalysts</i>         |                    |       |                                         |                |                                         |                |
| PdBr <sub>2</sub>                            | 0.0027             | 0.01  | 1.24 (1.13-1.35)                        | 0.008          | 0.82 (0.74-0.90)                        | 0.012          |
| K <sub>2</sub> CO <sub>3</sub>               | 0.1660             | 1.20  | 20.89 (19.63-22.15)                     | 0.057          | 10.49 (9.51-11.47)                      | 0.115          |
| Water                                        | 0.3990             | 22.15 | - <sup>c</sup>                          | - <sup>c</sup> | - <sup>c</sup>                          | - <sup>c</sup> |
| Ethanol                                      | 1.2630             | 27.41 | 812.70 (797.02-828.38)                  | 0.034          | 767.70 (749.11-786.29)                  | 0.036          |
| <i>Product(s)</i>                            |                    |       |                                         |                |                                         |                |
| 1,1'-Biphenyl                                | 0.1540             | 1.00  | 4.50 (4.03-4.97)                        | 0.222          | 4.26 (3.68-4.84)                        | 0.234          |
| <i>Byproduct(s)</i>                          |                    |       |                                         |                |                                         |                |
| KI                                           | 0.1660             | 1.00  | 16.08 (15.27-16.89)                     | 0.062          | 2.11 (1.74-2.48)                        | 0.474          |
| K <sub>2</sub> B <sub>4</sub> O <sub>7</sub> | 0.0600             | 0.26  | 38.50 (36.96-40.04) <sup>d</sup>        | 0.007          | 31.24 (30.12-32.36) <sup>d</sup>        | 0.008          |
| H <sub>3</sub> BO <sub>3</sub>               | 0.0600             | 0.97  | 27.70 (26.25-29.15)                     | 0.035          | 10.24 (9.26-11.22)                      | 0.095          |
| <b>bio-Factor</b>                            |                    |       | <b>0.74</b>                             |                | <b>1.19</b>                             |                |
| <b>Reaction A-D-A<sup>a</sup></b>            |                    |       |                                         |                |                                         |                |
| <i>Starting materials</i>                    |                    |       |                                         |                |                                         |                |
| Iodobenzene                                  | 0.2040             | 1.00  | 3.37 (3.06-3.68)                        | 0.297          | 2.39 (2.18-2.60)                        | 0.418          |
| Phenylboronic acid                           | 0.1460             | 1.20  | 12.14 (11.08-13.20)                     | 0.099          | 8.45 (7.69-9.21)                        | 0.142          |

|                                              |                |       |                                  |                |                                  |                |
|----------------------------------------------|----------------|-------|----------------------------------|----------------|----------------------------------|----------------|
| <i>Reagents, solvents, catalysts</i>         |                |       |                                  |                |                                  |                |
| PdI <sub>2</sub>                             | 0.0036         | 0.01  | 1.79 (1.60-1.98)                 | 0.006          | 1.22 (1.10-1.34)                 | 0.008          |
| K <sub>2</sub> CO <sub>3</sub>               | 0.1660         | 1.20  | 20.89 (19.63-22.15)              | 0.057          | 10.49 (9.51-11.47)               | 0.115          |
| Water                                        | 0.3990         | 22.15 | - <sup>c</sup>                   | - <sup>c</sup> | - <sup>c</sup>                   | - <sup>c</sup> |
| Ethanol                                      | 1.2630         | 27.41 | 812.70 (797.02-828.38)           | 0.034          | 767.70 (749.11-786.29)           | 0.036          |
| <i>Product(s)</i>                            |                |       |                                  |                |                                  |                |
| 1,1'-Biphenyl                                | 0.1540         | 1.00  | 4.50 (4.03-4.97)                 | 0.222          | 4.26 (3.68-4.84)                 | 0.234          |
| <i>Byproduct(s)</i>                          |                |       |                                  |                |                                  |                |
| KI                                           | 0.1660         | 1.00  | 16.08 (15.27-16.89)              | 0.062          | 2.11 (1.74-2.48)                 | 0.474          |
| K <sub>2</sub> B <sub>4</sub> O <sub>7</sub> | 0.0600         | 0.26  | 38.50 (36.96-40.04) <sup>d</sup> | 0.007          | 31.24 (30.12-32.36) <sup>d</sup> | 0.008          |
| H <sub>3</sub> BO <sub>3</sub>               | 0.0600         | 0.97  | 27.70 (26.25-29.15)              | 0.035          | 10.24 (9.26-11.22)               | 0.095          |
| <b>bio-Factor</b>                            |                |       | <b>0.74</b>                      | <b>1.19</b>    |                                  |                |
| <b>Reaction A-B-B<sup>a</sup></b>            |                |       |                                  |                |                                  |                |
| <i>Starting materials</i>                    |                |       |                                  |                |                                  |                |
| Iodobenzene                                  | 0.2040         | 1.00  | 3.37 (3.06-3.68)                 | 0.297          | 2.39 (2.18-2.60)                 | 0.418          |
| Phenylboronic acid                           | 0.1460         | 1.20  | 12.14 (11.08-13.20)              | 0.099          | 8.45 (7.69-9.21)                 | 0.142          |
| <i>Reagents, solvents, catalysts</i>         |                |       |                                  |                |                                  |                |
| PdCl <sub>2</sub>                            | 0.0018         | 0.01  | 1.72 (1.55-1.89)                 | 0.006          | 1.23 (1.10-1.36)                 | 0.008          |
| K <sub>2</sub> CO <sub>3</sub>               | 0.1660         | 1.20  | 20.89 (19.63-22.15)              | 0.057          | 10.49 (9.51-11.47)               | 0.115          |
| Water                                        | 0.3990         | 22.15 | - <sup>c</sup>                   | - <sup>c</sup> | - <sup>c</sup>                   | - <sup>c</sup> |
| NMP                                          | 1.6480         | 16.62 | 79.16 (71.70-86.62)              | 0.210          | 58.61 (52.49-64.73)              | 0.284          |
| <i>Product(s)</i>                            |                |       |                                  |                |                                  |                |
| 1,1'-Biphenyl                                | 0.1540         | 1.00  | 4.50 (4.03-4.97)                 | 0.222          | 4.26 (3.68-4.84)                 | 0.234          |
| <i>Byproduct(s)</i>                          |                |       |                                  |                |                                  |                |
| KI                                           | 0.1660         | 1.00  | 16.08 (15.27-16.89)              | 0.062          | 2.11 (1.74-2.48)                 | 0.474          |
| K <sub>2</sub> B <sub>4</sub> O <sub>7</sub> | 0.0600         | 0.26  | 38.50 (36.96-40.04) <sup>d</sup> | 0.007          | 31.24 (30.12-32.36) <sup>d</sup> | 0.008          |
| H <sub>3</sub> BO <sub>3</sub>               | 0.0600<br>0.97 |       | 27.70 (26.25-29.15)              | 0.035          | 10.24 (9.26-11.22)               | 0.095          |
| <b>bio-Factor</b>                            |                |       | <b>0.81</b>                      | <b>1.14</b>    |                                  |                |
| <b>Reaction A-C-B<sup>a</sup></b>            |                |       |                                  |                |                                  |                |
| <i>Starting materials</i>                    |                |       |                                  |                |                                  |                |
| Iodobenzene                                  | 0.2040         | 1.00  | 3.37 (3.06-3.68)                 | 0.297          | 2.39 (2.18-2.60)                 | 0.418          |
| Phenylboronic acid                           | 0.1460         | 1.20  | 12.14 (11.08-13.20)              | 0.099          | 8.45 (7.69-9.21)                 | 0.142          |
| <i>Reagents, solvents, catalysts</i>         |                |       |                                  |                |                                  |                |
| PdBr <sub>2</sub>                            | 0.0027         | 0.01  | 1.24 (1.13-1.35)                 | 0.008          | 0.82 (0.74-0.90)                 | 0.012          |
| K <sub>2</sub> CO <sub>3</sub>               | 0.1660         | 1.20  | 20.89 (19.63-22.15)              | 0.057          | 10.49 (9.51-11.47)               | 0.115          |
| Water                                        | 0.3990         | 22.15 | - <sup>c</sup>                   | - <sup>c</sup> | - <sup>c</sup>                   | - <sup>c</sup> |
| NMP                                          | 1.6480         | 16.62 | 79.16 (71.70-86.62)              | 0.210          | 58.61 (52.49-64.73)              | 0.284          |
| <i>Product(s)</i>                            |                |       |                                  |                |                                  |                |
| 1,1'-Biphenyl                                | 0.1540         | 1.00  | 4.50 (4.03-4.97)                 | 0.222          | 4.26 (3.68-4.84)                 | 0.234          |
| <i>Byproduct(s)</i>                          |                |       |                                  |                |                                  |                |
| KI                                           | 0.1660         | 1.00  | 16.08 (15.27-16.89)              | 0.062          | 2.11 (1.74-2.48)                 | 0.474          |
| K <sub>2</sub> B <sub>4</sub> O <sub>7</sub> | 0.0600         | 0.26  | 38.50 (36.96-40.04) <sup>d</sup> | 0.007          | 31.24 (30.12-32.36) <sup>d</sup> | 0.008          |
| H <sub>3</sub> BO <sub>3</sub>               | 0.0600         | 0.97  | 27.70 (26.25-29.15)              | 0.035          | 10.24 (9.26-11.22)               | 0.095          |
| <b>bio-Factor</b>                            |                |       | <b>0.81</b>                      | <b>1.14</b>    |                                  |                |
| <b>Reaction A-D-B<sup>a</sup></b>            |                |       |                                  |                |                                  |                |
| <i>Starting materials</i>                    |                |       |                                  |                |                                  |                |
| Iodobenzene                                  | 0.2040         | 1.00  | 3.37 (3.06-3.68)                 | 0.297          | 2.39 (2.18-2.60)                 | 0.418          |
| Phenylboronic acid                           | 0.1460         | 1.20  | 12.14 (11.08-13.20)              | 0.099          | 8.45 (7.69-9.21)                 | 0.142          |
| <i>Reagents, solvents, catalysts</i>         |                |       |                                  |                |                                  |                |
| PdI <sub>2</sub>                             | 0.0036         | 0.01  | 1.79 (1.60-1.98)                 | 0.006          | 1.22 (1.10-1.34)                 | 0.008          |
| K <sub>2</sub> CO <sub>3</sub>               | 0.1660         | 1.20  | 20.89 (19.63-22.15)              | 0.057          | 10.49 (9.51-11.47)               | 0.115          |
| Water                                        | 0.3990         | 22.15 | - <sup>c</sup>                   | - <sup>c</sup> | - <sup>c</sup>                   | - <sup>c</sup> |
| NMP                                          | 1.6480         | 16.62 | 79.16 (71.70-86.62)              | 0.210          | 58.61 (52.49-64.73)              | 0.284          |
| <i>Product(s)</i>                            |                |       |                                  |                |                                  |                |
| 1,1'-Biphenyl                                | 0.1540         | 1.00  | 4.50 (4.03-4.97)                 | 0.222          | 4.26 (3.68-4.84)                 | 0.234          |
| <i>Byproduct(s)</i>                          |                |       |                                  |                |                                  |                |
| KI                                           | 0.1660         | 1.00  | 16.08 (15.27-16.89)              | 0.062          | 2.11 (1.74-2.48)                 | 0.474          |

|                                              |             |       |                                  |                |                                  |                |
|----------------------------------------------|-------------|-------|----------------------------------|----------------|----------------------------------|----------------|
| K <sub>2</sub> B <sub>4</sub> O <sub>7</sub> | 0.0600      | 0.26  | 38.50 (36.96-40.04) <sup>d</sup> | 0.007          | 31.24 (30.12-32.36) <sup>d</sup> | 0.008          |
| H <sub>3</sub> BO <sub>3</sub>               | 0.0600      | 0.97  | 27.70 (26.25-29.15)              | 0.035          | 10.24 (9.26-11.22)               | 0.095          |
| <b>bio-Factor</b>                            | <b>0.81</b> |       |                                  | <b>1.14</b>    |                                  |                |
| <b>Reaction B-A-A<sup>a</sup></b>            |             |       |                                  |                |                                  |                |
| <i>Starting materials</i>                    |             |       |                                  |                |                                  |                |
| Bromobenzene                                 | 0.1570      | 1.00  | 3.24 (2.93-3.55)                 | 0.309          | 2.17 (1.99-2.35)                 | 0.461          |
| Phenylboronic acid                           | 0.1460      | 1.20  | 12.14 (11.08-13.20)              | 0.099          | 8.45 (7.69-9.21)                 | 0.142          |
| <i>Reagents, solvents, catalysts</i>         |             |       |                                  |                |                                  |                |
| Pd(OAc) <sub>2</sub>                         | 0.0022      | 0.01  | 1.55 (1.43-1.67)                 | 0.006          | 0.85 (0.76-0.94)                 | 0.012          |
| K <sub>2</sub> CO <sub>3</sub>               | 0.1660      | 1.20  | 20.89 (19.63-22.15)              | 0.057          | 10.49 (9.51-11.47)               | 0.115          |
| Water                                        | 0.3990      | 22.15 | - <sup>c</sup>                   | - <sup>c</sup> | - <sup>c</sup>                   | - <sup>c</sup> |
| Ethanol                                      | 1.2630      | 27.41 | 812.70 (797.02-828.38)           | 0.034          | 767.70 (749.11-786.29)           | 0.036          |
| <i>Product(s)</i>                            |             |       |                                  |                |                                  |                |
| 1,1'-Biphenyl                                | 0.1540      | 1.00  | 4.50 (4.03-4.97)                 | 0.222          | 4.26 (3.68-4.84)                 | 0.234          |
| <i>Byproduct(s)</i>                          |             |       |                                  |                |                                  |                |
| KBr                                          | 0.119       | 1.00  | 89.48 (81.37-97.59)              | 0.011          | 67.12 (61.63-72.61)              | 0.015          |
| K <sub>2</sub> B <sub>4</sub> O <sub>7</sub> | 0.0600      | 0.26  | 38.50 (36.96-40.04) <sup>d</sup> | 0.007          | 31.24 (30.12-32.36) <sup>d</sup> | 0.008          |
| H <sub>3</sub> BO <sub>3</sub>               | 0.0600      | 0.97  | 27.70 (26.25-29.15)              | 0.035          | 10.24 (9.26-11.22)               | 0.095          |
| <b>bio-Factor</b>                            | <b>0.62</b> |       |                                  | <b>0.52</b>    |                                  |                |
| <b>Reaction B-B-A<sup>a</sup></b>            |             |       |                                  |                |                                  |                |
| <i>Starting materials</i>                    |             |       |                                  |                |                                  |                |
| Bromobenzene                                 | 0.1570      | 1.00  | 3.24 (2.93-3.55)                 | 0.309          | 2.17 (1.99-2.35)                 | 0.461          |
| Phenylboronic acid                           | 0.1460      | 1.20  | 12.14 (11.08-13.20)              | 0.099          | 8.45 (7.69-9.21)                 | 0.142          |
| <i>Reagents, solvents, catalysts</i>         |             |       |                                  |                |                                  |                |
| PdCl <sub>2</sub>                            | 0.0018      | 0.01  | 1.72 (1.55-1.89)                 | 0.006          | 1.23 (1.10-1.36)                 | 0.008          |
| K <sub>2</sub> CO <sub>3</sub>               | 0.1660      | 1.20  | 20.89 (19.63-22.15)              | 0.057          | 10.49 (9.51-11.47)               | 0.115          |
| Water                                        | 0.3990      | 22.15 | - <sup>c</sup>                   | - <sup>c</sup> | - <sup>c</sup>                   | - <sup>c</sup> |
| Ethanol                                      | 1.2630      | 27.41 | 812.70 (797.02-828.38)           | 0.034          | 767.70 (749.11-786.29)           | 0.036          |
| <i>Product(s)</i>                            |             |       |                                  |                |                                  |                |
| 1,1'-Biphenyl                                | 0.1540      | 1.00  | 4.50 (4.03-4.97)                 | 0.222          | 4.26 (3.68-4.84)                 | 0.234          |
| <i>Byproduct(s)</i>                          |             |       |                                  |                |                                  |                |
| KBr                                          | 0.119       | 1.00  | 89.48 (81.37-97.59)              | 0.011          | 67.12 (61.63-72.61)              | 0.015          |
| K <sub>2</sub> B <sub>4</sub> O <sub>7</sub> | 0.0600      | 0.26  | 38.50 (36.96-40.04) <sup>d</sup> | 0.007          | 31.24 (30.12-32.36) <sup>d</sup> | 0.008          |
| H <sub>3</sub> BO <sub>3</sub>               | 0.0600      | 0.97  | 27.70 (26.25-29.15)              | 0.035          | 10.24 (9.26-11.22)               | 0.095          |
| <b>bio-Factor</b>                            | <b>0.62</b> |       |                                  | <b>0.52</b>    |                                  |                |
| <b>Reaction B-C-A<sup>a</sup></b>            |             |       |                                  |                |                                  |                |
| <i>Starting materials</i>                    |             |       |                                  |                |                                  |                |
| Bromobenzene                                 | 0.1570      | 1.00  | 3.24 (2.93-3.55)                 | 0.309          | 2.17 (1.99-2.35)                 | 0.461          |
| Phenylboronic acid                           | 0.1460      | 1.20  | 12.14 (11.08-13.20)              | 0.099          | 8.45 (7.69-9.21)                 | 0.142          |
| <i>Reagents, solvents, catalysts</i>         |             |       |                                  |                |                                  |                |
| PdBr <sub>2</sub>                            | 0.0027      | 0.01  | 1.24 (1.13-1.35)                 | 0.008          | 0.82 (0.74-0.90)                 | 0.012          |
| K <sub>2</sub> CO <sub>3</sub>               | 0.1660      | 1.20  | 20.89 (19.63-22.15)              | 0.057          | 10.49 (9.51-11.47)               | 0.115          |
| Water                                        | 0.3990      | 22.15 | - <sup>c</sup>                   | - <sup>c</sup> | - <sup>c</sup>                   | - <sup>c</sup> |
| Ethanol                                      | 1.2630      | 27.41 | 812.70 (797.02-828.38)           | 0.034          | 767.70 (749.11-786.29)           | 0.036          |
| <i>Product(s)</i>                            |             |       |                                  |                |                                  |                |
| 1,1'-Biphenyl                                | 0.1540      | 1.00  | 4.50 (4.03-4.97)                 | 0.222          | 4.26 (3.68-4.84)                 | 0.234          |
| <i>Byproduct(s)</i>                          |             |       |                                  |                |                                  |                |
| KBr                                          | 0.119       | 1.00  | 89.48 (81.37-97.59)              | 0.011          | 67.12 (61.63-72.61)              | 0.015          |
| K <sub>2</sub> B <sub>4</sub> O <sub>7</sub> | 0.0600      | 0.26  | 38.50 (36.96-40.04) <sup>d</sup> | 0.007          | 31.24 (30.12-32.36) <sup>d</sup> | 0.008          |
| H <sub>3</sub> BO <sub>3</sub>               | 0.0600      | 0.97  | 27.70 (26.25-29.15)              | 0.035          | 10.24 (9.26-11.22)               | 0.095          |
| <b>bio-Factor</b>                            | <b>0.63</b> |       |                                  | <b>0.52</b>    |                                  |                |
| <b>Reaction B-D-A<sup>a</sup></b>            |             |       |                                  |                |                                  |                |
| <i>Starting materials</i>                    |             |       |                                  |                |                                  |                |
| Bromobenzene                                 | 0.1570      | 1.00  | 3.24 (2.93-3.55)                 | 0.309          | 2.17 (1.99-2.35)                 | 0.461          |

|                                              |        |       |                                  |                |                                  |                |
|----------------------------------------------|--------|-------|----------------------------------|----------------|----------------------------------|----------------|
| Phenylboronic acid                           | 0.1460 | 1.20  | 12.14 (11.08-13.20)              | 0.099          | 8.45 (7.69-9.21)                 | 0.142          |
| <i>Reagents, solvents, catalysts</i>         |        |       |                                  |                |                                  |                |
| PdI <sub>2</sub>                             | 0.0036 | 0.01  | 1.79 (1.60-1.98)                 | 0.006          | 1.22 (1.10-1.34)                 | 0.008          |
| K <sub>2</sub> CO <sub>3</sub>               | 0.1660 | 1.20  | 20.89 (19.63-22.15)              | 0.057          | 10.49 (9.51-11.47)               | 0.115          |
| Water                                        | 0.3990 | 22.15 | - <sup>c</sup>                   | - <sup>c</sup> | - <sup>c</sup>                   | - <sup>c</sup> |
| Ethanol                                      | 1.2630 | 27.41 | 812.70 (797.02-828.38)           | 0.034          | 767.70 (749.11-786.29)           | 0.036          |
| <i>Product(s)</i>                            |        |       |                                  |                |                                  |                |
| 1,1'-Biphenyl                                | 0.1540 | 1.00  | 4.50 (4.03-4.97)                 | 0.222          | 4.26 (3.68-4.84)                 | 0.234          |
| <i>Byproduct(s)</i>                          |        |       |                                  |                |                                  |                |
| KBr                                          | 0.119  | 1.00  | 89.48 (81.37-97.59)              | 0.011          | 67.12 (61.63-72.61)              | 0.015          |
| K <sub>2</sub> B <sub>4</sub> O <sub>7</sub> | 0.0600 | 0.26  | 38.50 (36.96-40.04) <sup>d</sup> | 0.007          | 31.24 (30.12-32.36) <sup>d</sup> | 0.008          |
| H <sub>3</sub> BO <sub>3</sub>               | 0.0600 | 0.97  | 27.70 (26.25-29.15)              | 0.035          | 10.24 (9.26-11.22)               | 0.095          |
| <b>bio-Factor</b>                            |        |       | <b>0.62</b>                      |                | <b>0.52</b>                      |                |
| <b>Reaction B-B-B<sup>a</sup></b>            |        |       |                                  |                |                                  |                |
| <i>Starting materials</i>                    |        |       |                                  |                |                                  |                |
| Bromobenzene                                 | 0.1570 | 1.00  | 3.24 (2.93-3.55)                 | 0.309          | 2.17 (1.99-2.35)                 | 0.461          |
| Phenylboronic acid                           | 0.1460 | 1.20  | 12.14 (11.08-13.20)              | 0.099          | 8.45 (7.69-9.21)                 | 0.142          |
| <i>Reagents, solvents, catalysts</i>         |        |       |                                  |                |                                  |                |
| PdCl <sub>2</sub>                            | 0.0018 | 0.01  | 1.72 (1.55-1.89)                 | 0.006          | 1.23 (1.10-1.36)                 | 0.008          |
| K <sub>2</sub> CO <sub>3</sub>               | 0.1660 | 1.20  | 20.89 (19.63-22.15)              | 0.057          | 10.49 (9.51-11.47)               | 0.115          |
| Water                                        | 0.3990 | 22.15 | - <sup>c</sup>                   | - <sup>c</sup> | - <sup>c</sup>                   | - <sup>c</sup> |
| NMP                                          | 1.6480 | 16.62 | 79.16 (71.70-86.62)              | 0.210          | 58.61 (52.49-64.73)              | 0.284          |
| <i>Product(s)</i>                            |        |       |                                  |                |                                  |                |
| 1,1'-Biphenyl                                | 0.1540 | 1.00  | 4.50 (4.03-4.97)                 | 0.222          | 4.26 (3.68-4.84)                 | 0.234          |
| <i>Byproduct(s)</i>                          |        |       |                                  |                |                                  |                |
| KBr                                          | 0.119  | 1.00  | 89.48 (81.37-97.59)              | 0.011          | 67.12 (61.63-72.61)              | 0.015          |
| K <sub>2</sub> B <sub>4</sub> O <sub>7</sub> | 0.0600 | 0.26  | 38.50 (36.96-40.04) <sup>d</sup> | 0.007          | 31.24 (30.12-32.36) <sup>d</sup> | 0.008          |
| H <sub>3</sub> BO <sub>3</sub>               | 0.0600 | 0.97  | 27.70 (26.25-29.15)              | 0.035          | 10.24 (9.26-11.22)               | 0.095          |
| <b>bio-Factor</b>                            |        |       | <b>0.72</b>                      |                | <b>0.64</b>                      |                |
| <b>Reaction B-C-B<sup>a</sup></b>            |        |       |                                  |                |                                  |                |
| <i>Starting materials</i>                    |        |       |                                  |                |                                  |                |
| Bromobenzene                                 | 0.1570 | 1.00  | 3.24 (2.93-3.55)                 | 0.309          | 2.17 (1.99-2.35)                 | 0.461          |
| Phenylboronic acid                           | 0.1460 | 1.20  | 12.14 (11.08-13.20)              | 0.099          | 8.45 (7.69-9.21)                 | 0.142          |
| <i>Reagents, solvents, catalysts</i>         |        |       |                                  |                |                                  |                |
| PdBr <sub>2</sub>                            | 0.0027 | 0.01  | 1.24 (1.13-1.35)                 | 0.008          | 0.82 (0.74-0.90)                 | 0.012          |
| K <sub>2</sub> CO <sub>3</sub>               | 0.1660 | 1.20  | 20.89 (19.63-22.15)              | 0.057          | 10.49 (9.51-11.47)               | 0.115          |
| Water                                        | 0.3990 | 22.15 | - <sup>c</sup>                   | - <sup>c</sup> | - <sup>c</sup>                   | - <sup>c</sup> |
| NMP                                          | 1.6480 | 16.62 | 79.16 (71.70-86.62)              | 0.210          | 58.61 (52.49-64.73)              | 0.284          |
| <i>Product(s)</i>                            |        |       |                                  |                |                                  |                |
| 1,1'-Biphenyl                                | 0.1540 | 1.00  | 4.50 (4.03-4.97)                 | 0.222          | 4.26 (3.68-4.84)                 | 0.234          |
| <i>Byproduct(s)</i>                          |        |       |                                  |                |                                  |                |
| KBr                                          | 0.119  | 1.00  | 89.48 (81.37-97.59)              | 0.011          | 67.12 (61.63-72.61)              | 0.015          |
| K <sub>2</sub> B <sub>4</sub> O <sub>7</sub> | 0.0600 | 0.26  | 38.50 (36.96-40.04) <sup>d</sup> | 0.007          | 31.24 (30.12-32.36) <sup>d</sup> | 0.008          |
| H <sub>3</sub> BO <sub>3</sub>               | 0.0600 | 0.97  | 27.70 (26.25-29.15)              | 0.035          | 10.24 (9.26-11.22)               | 0.095          |
| <b>bio-Factor</b>                            |        |       | <b>0.72</b>                      |                | <b>0.64</b>                      |                |
| <b>Reaction B-D-B<sup>a</sup></b>            |        |       |                                  |                |                                  |                |
| <i>Starting materials</i>                    |        |       |                                  |                |                                  |                |
| Bromobenzene                                 | 0.1570 | 1.00  | 3.24 (2.93-3.55)                 | 0.309          | 2.17 (1.99-2.35)                 | 0.461          |
| Phenylboronic acid                           | 0.1460 | 1.20  | 12.14 (11.08-13.20)              | 0.099          | 8.45 (7.69-9.21)                 | 0.142          |
| <i>Reagents, solvents, catalysts</i>         |        |       |                                  |                |                                  |                |
| PdI <sub>2</sub>                             | 0.0036 | 0.01  | 1.79 (1.60-1.98)                 | 0.006          | 1.22 (1.10-1.34)                 | 0.008          |
| K <sub>2</sub> CO <sub>3</sub>               | 0.1660 | 1.20  | 20.89 (19.63-22.15)              | 0.057          | 10.49 (9.51-11.47)               | 0.115          |
| Water                                        | 0.3990 | 22.15 | - <sup>c</sup>                   | - <sup>c</sup> | - <sup>c</sup>                   | - <sup>c</sup> |
| NMP                                          | 1.6480 | 16.62 | 79.16 (71.70-86.62)              | 0.210          | 58.61 (52.49-64.73)              | 0.284          |
| <i>Product(s)</i>                            |        |       |                                  |                |                                  |                |
| 1,1'-Biphenyl                                | 0.1540 | 1.00  | 4.50 (4.03-4.97)                 | 0.222          | 4.26 (3.68-4.84)                 | 0.234          |
| <i>Byproduct(s)</i>                          |        |       |                                  |                |                                  |                |

|                                              |             |       |                                  |                |                                  |                |
|----------------------------------------------|-------------|-------|----------------------------------|----------------|----------------------------------|----------------|
| KBr                                          | 0.119       | 1.00  | 89.48 (81.37-97.59)              | 0.011          | 67.12 (61.63-72.61)              | 0.015          |
| K <sub>2</sub> B <sub>4</sub> O <sub>7</sub> | 0.0600      | 0.26  | 38.50 (36.96-40.04) <sup>d</sup> | 0.007          | 31.24 (30.12-32.36) <sup>d</sup> | 0.008          |
| H <sub>3</sub> BO <sub>3</sub>               | 0.0600      | 0.97  | 27.70 (26.25-29.15)              | 0.035          | 10.24 (9.26-11.22)               | 0.095          |
| <b>bio-Factor</b>                            | <b>0.72</b> |       |                                  | <b>0.64</b>    |                                  |                |
| <b>Reaction C-A-A<sup>a</sup></b>            |             |       |                                  |                |                                  |                |
| <i>Starting materials</i>                    |             |       |                                  |                |                                  |                |
| Chlorobenzene                                | 0.1125      | 1.00  | 2.51 (2.25-2.77)                 | 0.398          | 1.92 (1.73-2.11)                 | 0.521          |
| Phenylboronic acid                           | 0.1460      | 1.20  | 12.14 (11.08-13.20)              | 0.099          | 8.45 (7.69-9.21)                 | 0.142          |
| <i>Reagents, solvents, catalysts</i>         |             |       |                                  |                |                                  |                |
| Pd(OAc) <sub>2</sub>                         | 0.0022      | 0.01  | 1.55 (1.43-1.67)                 | 0.006          | 0.85 (0.76-0.94)                 | 0.012          |
| K <sub>2</sub> CO <sub>3</sub>               | 0.1660      | 1.20  | 20.89 (19.63-22.15)              | 0.057          | 10.49 (9.51-11.47)               | 0.115          |
| Water                                        | 0.3990      | 22.15 | - <sup>c</sup>                   | - <sup>c</sup> | - <sup>c</sup>                   | - <sup>c</sup> |
| Ethanol                                      | 1.2630      | 27.41 | 812.70 (797.02-828.38)           | 0.034          | 767.70 (749.11-786.29)           | 0.036          |
| <i>Product(s)</i>                            |             |       |                                  |                |                                  |                |
| 1,1'-Biphenyl                                | 0.1540      | 1.00  | 4.50 (4.03-4.97)                 | 0.222          | 4.26 (3.68-4.84)                 | 0.234          |
| <i>Byproduct(s)</i>                          |             |       |                                  |                |                                  |                |
| KCl                                          | 0.0745      | 1.00  | 319.76 (289.80-349.72)           | 0.003          | 247.15 (224.32-269.98)           | 0.004          |
| K <sub>2</sub> B <sub>4</sub> O <sub>7</sub> | 0.0600      | 0.26  | 38.50 (36.96-40.04) <sup>d</sup> | 0.007          | 31.24 (30.12-32.36) <sup>d</sup> | 0.008          |
| H <sub>3</sub> BO <sub>3</sub>               | 0.0600      | 0.97  | 27.70 (26.25-29.15)              | 0.035          | 10.24 (9.26-11.22)               | 0.095          |
| <b>bio-Factor</b>                            | <b>0.52</b> |       |                                  | <b>0.47</b>    |                                  |                |
| <b>Reaction C-B-A<sup>a</sup></b>            |             |       |                                  |                |                                  |                |
| <i>Starting materials</i>                    |             |       |                                  |                |                                  |                |
| Chlorobenzene                                | 0.1125      | 1.00  | 2.51 (2.25-2.77)                 | 0.398          | 1.92 (1.73-2.11)                 | 0.521          |
| Phenylboronic acid                           | 0.1460      | 1.20  | 12.14 (11.08-13.20)              | 0.099          | 8.45 (7.69-9.21)                 | 0.142          |
| <i>Reagents, solvents, catalysts</i>         |             |       |                                  |                |                                  |                |
| PdCl <sub>2</sub>                            | 0.0018      | 0.01  | 1.72 (1.55-1.89)                 | 0.006          | 1.23 (1.10-1.36)                 | 0.008          |
| K <sub>2</sub> CO <sub>3</sub>               | 0.1660      | 1.20  | 20.89 (19.63-22.15)              | 0.057          | 10.49 (9.51-11.47)               | 0.115          |
| Water                                        | 0.3990      | 22.15 | - <sup>c</sup>                   | - <sup>c</sup> | - <sup>c</sup>                   | - <sup>c</sup> |
| Ethanol                                      | 1.2630      | 27.41 | 812.70 (797.02-828.38)           | 0.034          | 767.70 (749.11-786.29)           | 0.036          |
| <i>Product(s)</i>                            |             |       |                                  |                |                                  |                |
| 1,1'-Biphenyl                                | 0.1540      | 1.00  | 4.50 (4.03-4.97)                 | 0.222          | 4.26 (3.68-4.84)                 | 0.234          |
| <i>Byproduct(s)</i>                          |             |       |                                  |                |                                  |                |
| KCl                                          | 0.0745      | 1.00  | 319.76 (289.80-349.72)           | 0.003          | 247.15 (224.32-269.98)           | 0.004          |
| K <sub>2</sub> B <sub>4</sub> O <sub>7</sub> | 0.0600      | 0.26  | 38.50 (36.96-40.04) <sup>d</sup> | 0.007          | 31.24 (30.12-32.36) <sup>d</sup> | 0.008          |
| H <sub>3</sub> BO <sub>3</sub>               | 0.0600      | 0.97  | 27.70 (26.25-29.15)              | 0.035          | 10.24 (9.26-11.22)               | 0.095          |
| <b>bio-Factor</b>                            | <b>0.52</b> |       |                                  | <b>0.47</b>    |                                  |                |
| <b>Reaction C-C-A<sup>a</sup></b>            |             |       |                                  |                |                                  |                |
| <i>Starting materials</i>                    |             |       |                                  |                |                                  |                |
| Chlorobenzene                                | 0.1125      | 1.00  | 2.51 (2.25-2.77)                 | 0.398          | 1.92 (1.73-2.11)                 | 0.521          |
| Phenylboronic acid                           | 0.1460      | 1.20  | 12.14 (11.08-13.20)              | 0.099          | 8.45 (7.69-9.21)                 | 0.142          |
| <i>Reagents, solvents, catalysts</i>         |             |       |                                  |                |                                  |                |
| PdBr <sub>2</sub>                            | 0.0027      | 0.01  | 1.24 (1.13-1.35)                 | 0.008          | 0.82 (0.74-0.90)                 | 0.012          |
| K <sub>2</sub> CO <sub>3</sub>               | 0.1660      | 1.20  | 20.89 (19.63-22.15)              | 0.057          | 10.49 (9.51-11.47)               | 0.115          |
| Water                                        | 0.3990      | 22.15 | - <sup>c</sup>                   | - <sup>c</sup> | - <sup>c</sup>                   | - <sup>c</sup> |
| Ethanol                                      | 1.2630      | 27.41 | 812.70 (797.02-828.38)           | 0.034          | 767.70 (749.11-786.29)           | 0.036          |
| <i>Product(s)</i>                            |             |       |                                  |                |                                  |                |
| 1,1'-Biphenyl                                | 0.1540      | 1.00  | 4.50 (4.03-4.97)                 | 0.222          | 4.26 (3.68-4.84)                 | 0.234          |
| <i>Byproduct(s)</i>                          |             |       |                                  |                |                                  |                |
| KCl                                          | 0.0745      | 1.00  | 319.76 (289.80-349.72)           | 0.003          | 247.15 (224.32-269.98)           | 0.004          |
| K <sub>2</sub> B <sub>4</sub> O <sub>7</sub> | 0.0600      | 0.26  | 38.50 (36.96-40.04) <sup>d</sup> | 0.007          | 31.24 (30.12-32.36) <sup>d</sup> | 0.008          |
| H <sub>3</sub> BO <sub>3</sub>               | 0.0600      | 0.97  | 27.70 (26.25-29.15)              | 0.035          | 10.24 (9.26-11.22)               | 0.095          |
| <b>bio-Factor</b>                            | <b>0.52</b> |       |                                  | <b>0.47</b>    |                                  |                |
| <b>Reaction C-D-A<sup>a</sup></b>            |             |       |                                  |                |                                  |                |
| <i>Starting materials</i>                    |             |       |                                  |                |                                  |                |
| Chlorobenzene                                | 0.1125      | 1.00  | 2.51 (2.25-2.77)                 | 0.398          | 1.92 (1.73-2.11)                 | 0.521          |
| Phenylboronic acid                           | 0.1460      | 1.20  | 12.14 (11.08-13.20)              | 0.099          | 8.45 (7.69-9.21)                 | 0.142          |
| <i>Reagents, solvents, catalysts</i>         |             |       |                                  |                |                                  |                |
| PdI <sub>2</sub>                             | 0.0036      | 0.01  | 1.79 (1.60-1.98)                 | 0.006          | 1.22 (1.10-1.34)                 | 0.008          |

|                                              |        |       |                                  |                |                                  |                |
|----------------------------------------------|--------|-------|----------------------------------|----------------|----------------------------------|----------------|
| K <sub>2</sub> CO <sub>3</sub>               | 0.1660 | 1.20  | 20.89 (19.63-22.15)              | 0.057          | 10.49 (9.51-11.47)               | 0.115          |
| Water                                        | 0.3990 | 22.15 | - <sup>c</sup>                   | - <sup>c</sup> | - <sup>c</sup>                   | - <sup>c</sup> |
| Ethanol                                      | 1.2630 | 27.41 | 812.70 (797.02-828.38)           | 0.034          | 767.70 (749.11-786.29)           | 0.036          |
| <i>Product(s)</i>                            |        |       |                                  |                |                                  |                |
| 1,1'-Biphenyl                                | 0.1540 | 1.00  | 4.50 (4.03-4.97)                 | 0.222          | 4.26 (3.68-4.84)                 | 0.234          |
| <i>Byproduct(s)</i>                          |        |       |                                  |                |                                  |                |
| KCl                                          | 0.0745 | 1.00  | 319.76 (289.80-349.72)           | 0.003          | 247.15 (224.32-269.98)           | 0.004          |
| K <sub>2</sub> B <sub>4</sub> O <sub>7</sub> | 0.0600 | 0.26  | 38.50 (36.96-40.04) <sup>d</sup> | 0.007          | 31.24 (30.12-32.36) <sup>d</sup> | 0.008          |
| H <sub>3</sub> BO <sub>3</sub>               | 0.0600 | 0.97  | 27.70 (26.25-29.15)              | 0.035          | 10.24 (9.26-11.22)               | 0.095          |
| <b>bio-Factor</b>                            |        |       | <b>0.52</b>                      |                | <b>0.47</b>                      |                |
| <b>Reaction C-B-B<sup>a</sup></b>            |        |       |                                  |                |                                  |                |
| <i>Starting materials</i>                    |        |       |                                  |                |                                  |                |
| Chlorobenzene                                | 0.1125 | 1.00  | 2.51 (2.25-2.77)                 | 0.398          | 1.92 (1.73-2.11)                 | 0.521          |
| Phenylboronic acid                           | 0.1460 | 1.20  | 12.14 (11.08-13.20)              | 0.099          | 8.45 (7.69-9.21)                 | 0.142          |
| <i>Reagents, solvents, catalysts</i>         |        |       |                                  |                |                                  |                |
| PdCl <sub>2</sub>                            | 0.0018 | 0.01  | 1.72 (1.55-1.89)                 | 0.006          | 1.23 (1.10-1.36)                 | 0.008          |
| K <sub>2</sub> CO <sub>3</sub>               | 0.1660 | 1.20  | 20.89 (19.63-22.15)              | 0.057          | 10.49 (9.51-11.47)               | 0.115          |
| Water                                        | 0.3990 | 22.15 | - <sup>c</sup>                   | - <sup>c</sup> | - <sup>c</sup>                   | - <sup>c</sup> |
| NMP                                          | 1.6480 | 16.62 | 79.16 (71.70-86.62)              | 0.210          | 58.61 (52.49-64.73)              | 0.284          |
| <i>Product(s)</i>                            |        |       |                                  |                |                                  |                |
| 1,1'-Biphenyl                                | 0.1540 | 1.00  | 4.50 (4.03-4.97)                 | 0.222          | 4.26 (3.68-4.84)                 | 0.234          |
| <i>Byproduct(s)</i>                          |        |       |                                  |                |                                  |                |
| KCl                                          | 0.0745 | 1.00  | 319.76 (289.80-349.72)           | 0.003          | 247.15 (224.32-269.98)           | 0.004          |
| K <sub>2</sub> B <sub>4</sub> O <sub>7</sub> | 0.0600 | 0.26  | 38.50 (36.96-40.04) <sup>d</sup> | 0.007          | 31.24 (30.12-32.36) <sup>d</sup> | 0.008          |
| H <sub>3</sub> BO <sub>3</sub>               | 0.0600 | 0.97  | 27.70 (26.25-29.15)              | 0.035          | 10.24 (9.26-11.22)               | 0.095          |
| <b>bio-Factor</b>                            |        |       | <b>0.63</b>                      |                | <b>0.59</b>                      |                |
| <b>Reaction C-C-B<sup>a</sup></b>            |        |       |                                  |                |                                  |                |
| <i>Starting materials</i>                    |        |       |                                  |                |                                  |                |
| Chlorobenzene                                | 0.1125 | 1.00  | 2.51 (2.25-2.77)                 | 0.398          | 1.92 (1.73-2.11)                 | 0.521          |
| Phenylboronic acid                           | 0.1460 | 1.20  | 12.14 (11.08-13.20)              | 0.099          | 8.45 (7.69-9.21)                 | 0.142          |
| <i>Reagents, solvents, catalysts</i>         |        |       |                                  |                |                                  |                |
| PdBr <sub>2</sub>                            | 0.0027 | 0.01  | 1.24 (1.13-1.35)                 | 0.008          | 0.82 (0.74-0.90)                 | 0.012          |
| K <sub>2</sub> CO <sub>3</sub>               | 0.1660 | 1.20  | 20.89 (19.63-22.15)              | 0.057          | 10.49 (9.51-11.47)               | 0.115          |
| Water                                        | 0.3990 | 22.15 | - <sup>c</sup>                   | - <sup>c</sup> | - <sup>c</sup>                   | - <sup>c</sup> |
| NMP                                          | 1.6480 | 16.62 | 79.16 (71.70-86.62)              | 0.210          | 58.61 (52.49-64.73)              | 0.284          |
| <i>Product(s)</i>                            |        |       |                                  |                |                                  |                |
| 1,1'-Biphenyl                                | 0.1540 | 1.00  | 4.50 (4.03-4.97)                 | 0.222          | 4.26 (3.68-4.84)                 | 0.234          |
| <i>Byproduct(s)</i>                          |        |       |                                  |                |                                  |                |
| KCl                                          | 0.0745 | 1.00  | 319.76 (289.80-349.72)           | 0.003          | 247.15 (224.32-269.98)           | 0.004          |
| K <sub>2</sub> B <sub>4</sub> O <sub>7</sub> | 0.0600 | 0.26  | 38.50 (36.96-40.04) <sup>d</sup> | 0.007          | 31.24 (30.12-32.36) <sup>d</sup> | 0.008          |
| H <sub>3</sub> BO <sub>3</sub>               | 0.0600 | 0.97  | 27.70 (26.25-29.15)              | 0.035          | 10.24 (9.26-11.22)               | 0.095          |
| <b>bio-Factor</b>                            |        |       | <b>0.63</b>                      |                | <b>0.59</b>                      |                |
| <b>Reaction C-D-B<sup>a</sup></b>            |        |       |                                  |                |                                  |                |
| <i>Starting materials</i>                    |        |       |                                  |                |                                  |                |
| Chlorobenzene                                | 0.1125 | 1.00  | 2.51 (2.25-2.77)                 | 0.398          | 1.92 (1.73-2.11)                 | 0.521          |
| Phenylboronic acid                           | 0.1460 | 1.20  | 12.14 (11.08-13.20)              | 0.099          | 8.45 (7.69-9.21)                 | 0.142          |
| <i>Reagents, solvents, catalysts</i>         |        |       |                                  |                |                                  |                |
| PdI <sub>2</sub>                             | 0.0036 | 0.01  | 1.79 (1.60-1.98)                 | 0.006          | 1.22 (1.10-1.34)                 | 0.008          |
| K <sub>2</sub> CO <sub>3</sub>               | 0.1660 | 1.20  | 20.89 (19.63-22.15)              | 0.057          | 10.49 (9.51-11.47)               | 0.115          |
| Water                                        | 0.3990 | 22.15 | - <sup>c</sup>                   | - <sup>c</sup> | - <sup>c</sup>                   | - <sup>c</sup> |
| NMP                                          | 1.6480 | 16.62 | 79.16 (71.70-86.62)              | 0.210          | 58.61 (52.49-64.73)              | 0.284          |
| <i>Product(s)</i>                            |        |       |                                  |                |                                  |                |
| 1,1'-Biphenyl                                | 0.1540 | 1.00  | 4.50 (4.03-4.97)                 | 0.222          | 4.26 (3.68-4.84)                 | 0.234          |
| <i>Byproduct(s)</i>                          |        |       |                                  |                |                                  |                |
| KCl                                          | 0.0745 | 1.00  | 319.76 (289.80-349.72)           | 0.003          | 247.15 (224.32-269.98)           | 0.004          |
| K <sub>2</sub> B <sub>4</sub> O <sub>7</sub> | 0.0600 | 0.26  | 38.50 (36.96-40.04) <sup>d</sup> | 0.007          | 31.24 (30.12-32.36) <sup>d</sup> | 0.008          |
| H <sub>3</sub> BO <sub>3</sub>               | 0.0600 | 0.97  | 27.70 (26.25-29.15)              | 0.035          | 10.24 (9.26-11.22)               | 0.095          |
| <b>bio-Factor</b>                            |        |       | <b>0.63</b>                      |                | <b>0.59</b>                      |                |



<sup>a</sup> The product yield is considered as 100%. The first, second and third letters in the reaction names correspond to the type of starting material, catalyst, and solvent, respectively. Starting material: A, iodobenzene, B, bromobenzene, C, chlorobenzene; catalyst: A, Pd(OAc)<sub>2</sub>; B, PdCl<sub>2</sub>; C, PdBr<sub>2</sub>; D, PdI<sub>2</sub>. Solvent: A, ethanol; B, *N*-methylpyrrolidone (NMP). The compounds being varied in the reactions are also highlighted in different colors. <sup>b</sup> 95% confidence intervals are shown in parentheses. <sup>c</sup> Not tested. <sup>d</sup> CC<sub>50</sub> for Na<sub>2</sub>B<sub>4</sub>O<sub>7</sub>, which is supposed to be similar to that for K<sub>2</sub>B<sub>4</sub>O<sub>7</sub>, is used.

**Table S7.** Experimental data used for construction of bio-Profiles for 1,1'-biphenyl synthesis by using water/surfactant method

| Substances                                   | Amount in reaction |       | HEK293                                  |                | A549                                    |                |
|----------------------------------------------|--------------------|-------|-----------------------------------------|----------------|-----------------------------------------|----------------|
|                                              | g                  | mmol  | 24-h CC <sub>50</sub> , mM <sup>b</sup> | NC             | 24-h CC <sub>50</sub> , mM <sup>b</sup> | NC             |
| <b>Reaction A-B-C<sup>d</sup></b>            |                    |       |                                         |                |                                         |                |
| <i>Starting materials</i>                    |                    |       |                                         |                |                                         |                |
| Iodobenzene                                  | 0.2040             | 1.00  | 3.37 (3.06-3.68)                        | 0.297          | 2.39 (2.18-2.60)                        | 0.418          |
| Phenylboronic acid                           | 0.1460             | 1.20  | 12.14 (11.08-13.20)                     | 0.099          | 8.45 (7.69-9.21)                        | 0.142          |
| <i>Reagents, solvents, catalysts</i>         |                    |       |                                         |                |                                         |                |
| PdCl <sub>2</sub>                            | 0.0018             | 0.01  | 1.72 (1.55-1.89)                        | 0.006          | 1.23 (1.10-1.36)                        | 0.008          |
| K <sub>2</sub> CO <sub>3</sub>               | 0.1660             | 1.20  | 20.89 (19.63-22.15)                     | 0.057          | 10.49 (9.51-11.47)                      | 0.115          |
| Water                                        | 0.3990             | 22.15 | - <sup>c</sup>                          | - <sup>c</sup> | - <sup>c</sup>                          | - <sup>c</sup> |
| SDS                                          | 0.0721             | 0.25  | 2.62 (2.35-2.89)                        | 0.095          | 1.44 (1.28-1.60)                        | 0.174          |
| Toluene                                      | 0.8670             | 9.41  | 12.97 (11.79-14.15)                     | 0.725          | 11.83 (10.87-12.79)                     | 0.795          |
| Ethanol                                      | 1.2630             | 27.41 | 812.70 (797.02-828.38)                  | 0.034          | 767.70 (749.11-786.29)                  | 0.036          |
| <i>Product(s)</i>                            |                    |       |                                         |                |                                         |                |
| 1,1'-Biphenyl                                | 0.1540             | 1.00  | 4.50 (4.03-4.97)                        | 0.222          | 4.26 (3.68-4.84)                        | 0.234          |
| <i>Byproduct(s)</i>                          |                    |       |                                         |                |                                         |                |
| KI                                           | 0.1660             | 1.00  | 16.08 (15.27-16.89)                     | 0.062          | 2.11 (1.74-2.48)                        | 0.474          |
| K <sub>2</sub> B <sub>4</sub> O <sub>7</sub> | 0.0600             | 0.26  | 38.50 (36.96-40.04) <sup>d</sup>        | 0.007          | 31.24 (30.12-32.36) <sup>d</sup>        | 0.008          |
| H <sub>3</sub> BO <sub>3</sub>               | 0.0600             | 0.97  | 27.70 (26.25-29.15)                     | 0.035          | 10.24 (9.26-11.22)                      | 0.095          |
| <b>bio-Factor</b>                            |                    |       | <b>0.90</b>                             |                | <b>1.08</b>                             |                |
| <b>Reaction A-B-D<sup>d</sup></b>            |                    |       |                                         |                |                                         |                |
| <i>Starting materials</i>                    |                    |       |                                         |                |                                         |                |
| Iodobenzene                                  | 0.2040             | 1.00  | 3.37 (3.06-3.68)                        | 0.297          | 2.39 (2.18-2.60)                        | 0.418          |
| Phenylboronic acid                           | 0.1460             | 1.20  | 12.14 (11.08-13.20)                     | 0.099          | 8.45 (7.69-9.21)                        | 0.142          |
| <i>Reagents, solvents, catalysts</i>         |                    |       |                                         |                |                                         |                |
| PdCl <sub>2</sub>                            | 0.0018             | 0.01  | 1.72 (1.55-1.89)                        | 0.006          | 1.23 (1.10-1.36)                        | 0.008          |
| K <sub>2</sub> CO <sub>3</sub>               | 0.1660             | 1.20  | 20.89 (19.63-22.15)                     | 0.057          | 10.49 (9.51-11.47)                      | 0.115          |
| Water                                        | 0.3990             | 22.15 | - <sup>c</sup>                          | - <sup>c</sup> | - <sup>c</sup>                          | - <sup>c</sup> |
| TBAB                                         | 0.0806             | 0.25  | 7.85 (7.09-8.61)                        | 0.032          | 3.96 (3.54-4.38)                        | 0.063          |
| Toluene                                      | 0.8670             | 9.41  | 12.97 (11.79-14.15)                     | 0.725          | 11.83 (10.87-12.79)                     | 0.795          |
| Ethanol                                      | 1.2630             | 27.41 | 812.70 (797.02-828.38)                  | 0.034          | 767.70 (749.11-786.29)                  | 0.036          |
| <i>Product(s)</i>                            |                    |       |                                         |                |                                         |                |
| 1,1'-Biphenyl                                | 0.1540             | 1.00  | 4.50 (4.03-4.97)                        | 0.222          | 4.26 (3.68-4.84)                        | 0.234          |
| <i>Byproduct(s)</i>                          |                    |       |                                         |                |                                         |                |
| KI                                           | 0.1660             | 1.00  | 16.08 (15.27-16.89)                     | 0.062          | 2.11 (1.74-2.48)                        | 0.474          |
| K <sub>2</sub> B <sub>4</sub> O <sub>7</sub> | 0.0600             | 0.26  | 38.50 (36.96-40.04) <sup>d</sup>        | 0.007          | 31.24 (30.12-32.36) <sup>d</sup>        | 0.008          |
| H <sub>3</sub> BO <sub>3</sub>               | 0.0600             | 0.97  | 27.70 (26.25-29.15)                     | 0.035          | 10.24 (9.26-11.22)                      | 0.095          |
| <b>bio-Factor</b>                            |                    |       | <b>0.90</b>                             |                | <b>1.09</b>                             |                |
| <b>Reaction A-B-E<sup>d</sup></b>            |                    |       |                                         |                |                                         |                |
| <i>Starting materials</i>                    |                    |       |                                         |                |                                         |                |
| Iodobenzene                                  | 0.2040             | 1.00  | 3.37 (3.06-3.68)                        | 0.297          | 2.39 (2.18-2.60)                        | 0.418          |
| Phenylboronic acid                           | 0.1460             | 1.20  | 12.14 (11.08-13.20)                     | 0.099          | 8.45 (7.69-9.21)                        | 0.142          |
| <i>Reagents, solvents, catalysts</i>         |                    |       |                                         |                |                                         |                |
| PdCl <sub>2</sub>                            | 0.0018             | 0.01  | 1.72 (1.55-1.89)                        | 0.006          | 1.23 (1.10-1.36)                        | 0.008          |
| K <sub>2</sub> CO <sub>3</sub>               | 0.1660             | 1.20  | 20.89 (19.63-22.15)                     | 0.057          | 10.49 (9.51-11.47)                      | 0.115          |
| Water                                        | 0.3990             | 22.15 | - <sup>c</sup>                          | - <sup>c</sup> | - <sup>c</sup>                          | - <sup>c</sup> |
| TBAC                                         | 0.0695             | 0.25  | 24.57 (22.36-26.78)                     | 0.010          | 12.29 (10.95-13.63)                     | 0.020          |
| Toluene                                      | 0.8670             | 9.41  | 12.97 (11.79-14.15)                     | 0.725          | 11.83 (10.87-12.79)                     | 0.795          |
| Ethanol                                      | 1.2630             | 27.41 | 812.70 (797.02-828.38)                  | 0.034          | 767.70 (749.11-786.29)                  | 0.036          |
| <i>Product(s)</i>                            |                    |       |                                         |                |                                         |                |
| 1,1'-Biphenyl                                | 0.1540             | 1.00  | 4.50 (4.03-4.97)                        | 0.222          | 4.26 (3.68-4.84)                        | 0.234          |
| <i>Byproduct(s)</i>                          |                    |       |                                         |                |                                         |                |
| KI                                           | 0.1660             | 1.00  | 16.08 (15.27-16.89)                     | 0.062          | 2.11 (1.74-2.48)                        | 0.474          |
| K <sub>2</sub> B <sub>4</sub> O <sub>7</sub> | 0.0600             | 0.26  | 38.50 (36.96-40.04) <sup>d</sup>        | 0.007          | 31.24 (30.12-32.36) <sup>d</sup>        | 0.008          |

|                                              |        |       |                                  |                |                                  |                |
|----------------------------------------------|--------|-------|----------------------------------|----------------|----------------------------------|----------------|
| H <sub>3</sub> BO <sub>3</sub>               | 0.0600 | 0.97  | 27.70 (26.25-29.15)              | 0.035          | 10.24 (9.26-11.22)               | 0.095          |
| <b>bio-Factor</b>                            |        |       | <b>0.90</b>                      |                | <b>1.09</b>                      |                |
| <b>Reaction A-B-F</b>                        |        |       |                                  |                |                                  |                |
| <i>Starting materials</i>                    |        |       |                                  |                |                                  |                |
| Iodobenzene                                  | 0.2040 | 1.00  | 3.37 (3.06-3.68)                 | 0.297          | 2.39 (2.18-2.60)                 | 0.418          |
| Phenylboronic acid                           | 0.1460 | 1.20  | 12.14 (11.08-13.20)              | 0.099          | 8.45 (7.69-9.21)                 | 0.142          |
| <i>Reagents, solvents, catalysts</i>         |        |       |                                  |                |                                  |                |
| PdCl <sub>2</sub>                            | 0.0018 | 0.01  | 1.72 (1.55-1.89)                 | 0.006          | 1.23 (1.10-1.36)                 | 0.008          |
| K <sub>2</sub> CO <sub>3</sub>               | 0.1660 | 1.20  | 20.89 (19.63-22.15)              | 0.057          | 10.49 (9.51-11.47)               | 0.115          |
| Water                                        | 0.3990 | 22.15 | - <sup>c</sup>                   | - <sup>c</sup> | - <sup>c</sup>                   | - <sup>c</sup> |
| Oct <sub>1</sub> (Me) <sub>3</sub> NCl       | 0.0520 | 0.25  | 3.16 (2.82-3.48)                 | 0.079          | 1.99 (1.79-2.20)                 | 0.126          |
| Toluene                                      | 0.8670 | 9.41  | 12.97 (11.79-14.15)              | 0.725          | 11.83 (10.87-12.79)              | 0.795          |
| Ethanol                                      | 1.2630 | 27.41 | 812.70 (797.02-828.38)           | 0.034          | 767.70 (749.11-786.29)           | 0.036          |
| <i>Product(s)</i>                            |        |       |                                  |                |                                  |                |
| 1,1'-Biphenyl                                | 0.1540 | 1.00  | 4.50 (4.03-4.97)                 | 0.222          | 4.26 (3.68-4.84)                 | 0.234          |
| <i>Byproduct(s)</i>                          |        |       |                                  |                |                                  |                |
| KI                                           | 0.1660 | 1.00  | 16.08 (15.27-16.89)              | 0.062          | 2.11 (1.74-2.48)                 | 0.474          |
| K <sub>2</sub> B <sub>4</sub> O <sub>7</sub> | 0.0600 | 0.26  | 38.50 (36.96-40.04) <sup>d</sup> | 0.007          | 31.24 (30.12-32.36) <sup>d</sup> | 0.008          |
| H <sub>3</sub> BO <sub>3</sub>               | 0.0600 | 0.97  | 27.70 (26.25-29.15)              | 0.035          | 10.24 (9.26-11.22)               | 0.095          |
| <b>bio-Factor</b>                            |        |       | <b>0.90</b>                      |                | <b>1.08</b>                      |                |
| <b>Reaction A-B-G<sup>a</sup></b>            |        |       |                                  |                |                                  |                |
| <i>Starting materials</i>                    |        |       |                                  |                |                                  |                |
| Iodobenzene                                  | 0.2040 | 1.00  | 3.37 (3.06-3.68)                 | 0.297          | 2.39 (2.18-2.60)                 | 0.418          |
| Phenylboronic acid                           | 0.1460 | 1.20  | 12.14 (11.08-13.20)              | 0.099          | 8.45 (7.69-9.21)                 | 0.142          |
| <i>Reagents, solvents, catalysts</i>         |        |       |                                  |                |                                  |                |
| PdCl <sub>2</sub>                            | 0.0018 | 0.01  | 1.72 (1.55-1.89)                 | 0.006          | 1.23 (1.10-1.36)                 | 0.008          |
| K <sub>2</sub> CO <sub>3</sub>               | 0.1660 | 1.20  | 20.89 (19.63-22.15)              | 0.057          | 10.49 (9.51-11.47)               | 0.115          |
| Water                                        | 0.3990 | 22.15 | - <sup>c</sup>                   | - <sup>c</sup> | - <sup>c</sup>                   | - <sup>c</sup> |
| PEG-400                                      | 0.1000 | 0.25  | 874.21 (795.85-952.57)           | 0.0003         | 416.78 (377.99-455.57)           | 0.0006         |
| Toluene                                      | 0.8670 | 9.41  | 12.97 (11.79-14.15)              | 0.725          | 11.83 (10.87-12.79)              | 0.795          |
| Ethanol                                      | 1.2630 | 27.41 | 812.70 (797.02-828.38)           | 0.034          | 767.70 (749.11-786.29)           | 0.036          |
| <i>Product(s)</i>                            |        |       |                                  |                |                                  |                |
| 1,1'-Biphenyl                                | 0.1540 | 1.00  | 4.50 (4.03-4.97)                 | 0.222          | 4.26 (3.68-4.84)                 | 0.234          |
| <i>Byproduct(s)</i>                          |        |       |                                  |                |                                  |                |
| KI                                           | 0.1660 | 1.00  | 16.08 (15.27-16.89)              | 0.062          | 2.11 (1.74-2.48)                 | 0.474          |
| K <sub>2</sub> B <sub>4</sub> O <sub>7</sub> | 0.0600 | 0.26  | 38.50 (36.96-40.04) <sup>d</sup> | 0.007          | 31.24 (30.12-32.36) <sup>d</sup> | 0.008          |
| H <sub>3</sub> BO <sub>3</sub>               | 0.0600 | 0.97  | 27.70 (26.25-29.15)              | 0.035          | 10.24 (9.26-11.22)               | 0.095          |
| <b>bio-Factor</b>                            |        |       | <b>0.90</b>                      |                | <b>1.09</b>                      |                |
| <b>Reaction A-B-H<sup>a</sup></b>            |        |       |                                  |                |                                  |                |
| <i>Starting materials</i>                    |        |       |                                  |                |                                  |                |
| Iodobenzene                                  | 0.2040 | 1.00  | 3.37 (3.06-3.68)                 | 0.297          | 2.39 (2.18-2.60)                 | 0.418          |
| Phenylboronic acid                           | 0.1460 | 1.20  | 12.14 (11.08-13.20)              | 0.099          | 8.45 (7.69-9.21)                 | 0.142          |
| <i>Reagents, solvents, catalysts</i>         |        |       |                                  |                |                                  |                |
| PdCl <sub>2</sub>                            | 0.0018 | 0.01  | 1.72 (1.55-1.89)                 | 0.006          | 1.23 (1.10-1.36)                 | 0.008          |
| K <sub>2</sub> CO <sub>3</sub>               | 0.1660 | 1.20  | 20.89 (19.63-22.15)              | 0.057          | 10.49 (9.51-11.47)               | 0.115          |
| Water                                        | 0.3990 | 22.15 | - <sup>c</sup>                   | - <sup>c</sup> | - <sup>c</sup>                   | - <sup>c</sup> |
| PEG-10000                                    | 2.5000 | 0.25  | 84.43 (76.32-92.54)              | 0.003          | 39.83 (36.65-43.01)              | 0.006          |
| Toluene                                      | 0.8670 | 9.41  | 12.97 (11.79-14.15)              | 0.725          | 11.83 (10.87-12.79)              | 0.795          |
| Ethanol                                      | 1.2630 | 27.41 | 812.70 (797.02-828.38)           | 0.034          | 767.70 (749.11-786.29)           | 0.036          |
| <i>Product(s)</i>                            |        |       |                                  |                |                                  |                |
| 1,1'-Biphenyl                                | 0.1540 | 1.00  | 4.50 (4.03-4.97)                 | 0.222          | 4.26 (3.68-4.84)                 | 0.234          |
| <i>Byproduct(s)</i>                          |        |       |                                  |                |                                  |                |
| KI                                           | 0.1660 | 1.00  | 16.08 (15.27-16.89)              | 0.062          | 2.11 (1.74-2.48)                 | 0.474          |
| K <sub>2</sub> B <sub>4</sub> O <sub>7</sub> | 0.0600 | 0.26  | 38.50 (36.96-40.04) <sup>d</sup> | 0.007          | 31.24 (30.12-32.36) <sup>d</sup> | 0.008          |
| H <sub>3</sub> BO <sub>3</sub>               | 0.0600 | 0.97  | 27.70 (26.25-29.15)              | 0.035          | 10.24 (9.26-11.22)               | 0.095          |
| <b>bio-Factor</b>                            |        |       | <b>0.90</b>                      |                | <b>1.09</b>                      |                |

| <b>Reaction A-B-I<sup>a</sup></b>            |        |       |                                  |                |                                  |                |
|----------------------------------------------|--------|-------|----------------------------------|----------------|----------------------------------|----------------|
| <i>Starting materials</i>                    |        |       |                                  |                |                                  |                |
| Iodobenzene                                  | 0.2040 | 1.00  | 3.37 (3.06-3.68)                 | 0.297          | 2.39 (2.18-2.60)                 | 0.418          |
| Phenylboronic acid                           | 0.1460 | 1.20  | 12.14 (11.08-13.20)              | 0.099          | 8.45 (7.69-9.21)                 | 0.142          |
| <i>Reagents, solvents, catalysts</i>         |        |       |                                  |                |                                  |                |
| PdCl <sub>2</sub>                            | 0.0018 | 0.01  | 1.72 (1.55-1.89)                 | 0.006          | 1.23 (1.10-1.36)                 | 0.008          |
| K <sub>2</sub> CO <sub>3</sub>               | 0.1660 | 1.20  | 20.89 (19.63-22.15)              | 0.057          | 10.49 (9.51-11.47)               | 0.115          |
| Water                                        | 0.3990 | 22.15 | - <sup>c</sup>                   | - <sup>c</sup> | - <sup>c</sup>                   | - <sup>c</sup> |
| PEG-35000                                    | 8.75   | 0.25  | 28.96 (26.31-31.61)              | 0.009          | 15.49 (13.87-17.11)              | 0.016          |
| Toluene                                      | 0.8670 | 9.41  | 12.97 (11.79-14.15)              | 0.725          | 11.83 (10.87-12.79)              | 0.795          |
| Ethanol                                      | 1.2630 | 27.41 | 812.70 (797.02-828.38)           | 0.034          | 767.70 (749.11-786.29)           | 0.036          |
| <i>Product(s)</i>                            |        |       |                                  |                |                                  |                |
| 1,1'-Biphenyl                                | 0.1540 | 1.00  | 4.50 (4.03-4.97)                 | 0.222          | 4.26 (3.68-4.84)                 | 0.234          |
| <i>Byproduct(s)</i>                          |        |       |                                  |                |                                  |                |
| KI                                           | 0.1660 | 1.00  | 16.08 (15.27-16.89)              | 0.062          | 2.11 (1.74-2.48)                 | 0.474          |
| K <sub>2</sub> B <sub>4</sub> O <sub>7</sub> | 0.0600 | 0.26  | 38.50 (36.96-40.04) <sup>d</sup> | 0.007          | 31.24 (30.12-32.36) <sup>d</sup> | 0.008          |
| H <sub>3</sub> BO <sub>3</sub>               | 0.0600 | 0.97  | 27.70 (26.25-29.15)              | 0.035          | 10.24 (9.26-11.22)               | 0.095          |
| <b>bio-Factor</b>                            |        |       | <b>0.90</b>                      |                | <b>1.09</b>                      |                |

<sup>a</sup> The product yield is considered as 100%. The first, second and third letters in the reaction names correspond to the type of starting material, catalyst, and solvent/surfactant, respectively. Surfactant: C, SDS (sodium dodecylsulfate); D, TBAB (tetrabutylammonium bromide); E, TBAC (tetrabutylammonium chloride); F, Oct<sub>1</sub>(Me)<sub>3</sub>NCl (octyltrimethylammonium chloride); G, PEG-400; H, PEG-10000; I, PEG-35000. The compounds being varied in the reactions are also highlighted in different colors. <sup>b</sup> 95% confidence intervals are shown in parentheses. <sup>c</sup> Not tested. <sup>d</sup> CC<sub>50</sub> for Na<sub>2</sub>B<sub>4</sub>O<sub>7</sub>, which is supposed to be similar to that for K<sub>2</sub>B<sub>4</sub>O<sub>7</sub>, is used.

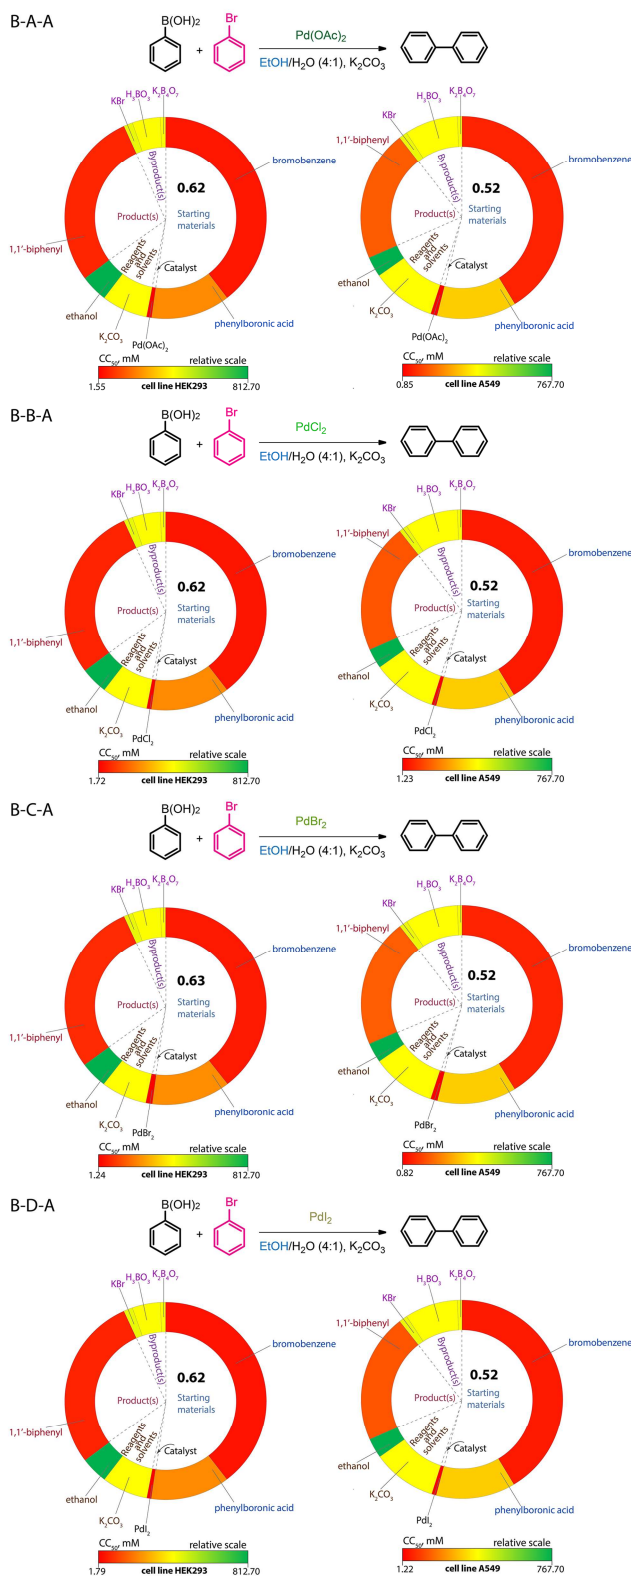

**Fig. S7.** Bio-Profiles for routes of synthesis of 1,1'-biphenyl with various catalysts. The first, second and third letters in the reaction names correspond to the type of starting material (in this case, bromobenzene (B)), catalyst ( $\text{Pd}(\text{OAc})_2$  (A),  $\text{PdCl}_2$  (B),  $\text{PdBr}_2$  (C),  $\text{PdI}_2$  (D)), and solvent (in this case, ethanol (A)). The area of the sectors in the diagrams corresponds to the “normalized cytotoxicity” (NC) of the compounds. The color of the sectors corresponds to the actual values of  $\text{CC}_{50}$  of the substances in a given cell line (see the relative cytotoxicity scales under the diagrams; the least toxic substance is shown in green, the most toxic is in red, and the other substances are of intermediate shades of red, orange and yellow). The calculated bio-Factors are shown inside the diagrams. See Table S6 for details.

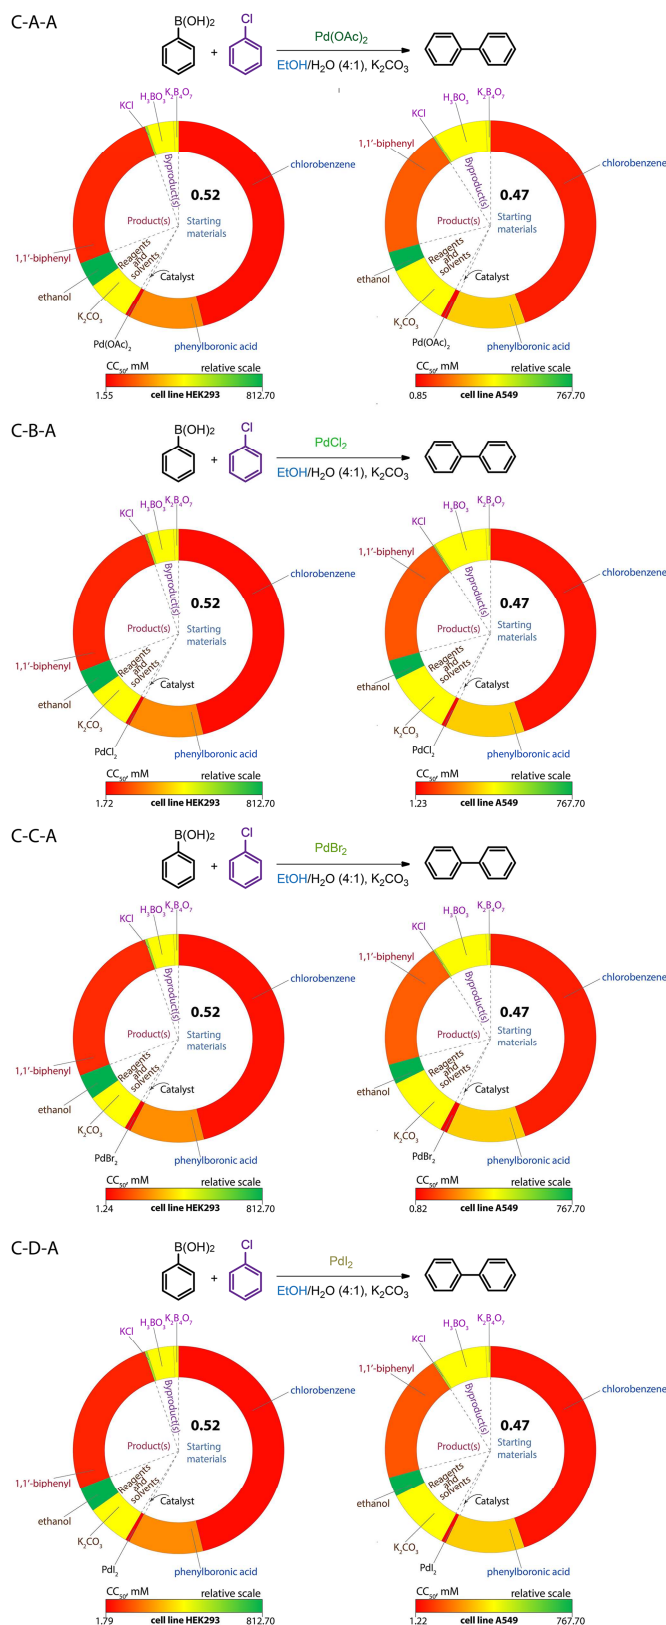

**Fig. S8.** Bio-Profiles for routes of synthesis of 1,1'-biphenyl with various catalysts. The first, second and third letters in the reaction names correspond to the type of starting material (in this case, chlorobenzene (C)), catalyst ( $\text{Pd}(\text{OAc})_2$  (A),  $\text{PdCl}_2$  (B),  $\text{PdBr}_2$  (C),  $\text{PdI}_2$  (D)), and solvent (in this case, ethanol (A)). The area of the sectors in the diagrams corresponds to the “normalized cytotoxicity” (NC) of the compounds. The color of the sectors corresponds to the actual values of  $\text{CC}_{50}$  of the substances in a given cell line (see the relative cytotoxicity scales under the diagrams; the least toxic substance is shown in green, the most toxic is in red, and the other substances are of intermediate shades of red, orange and yellow). The calculated bio-Factors are shown inside the diagrams. See Table S6 for details.

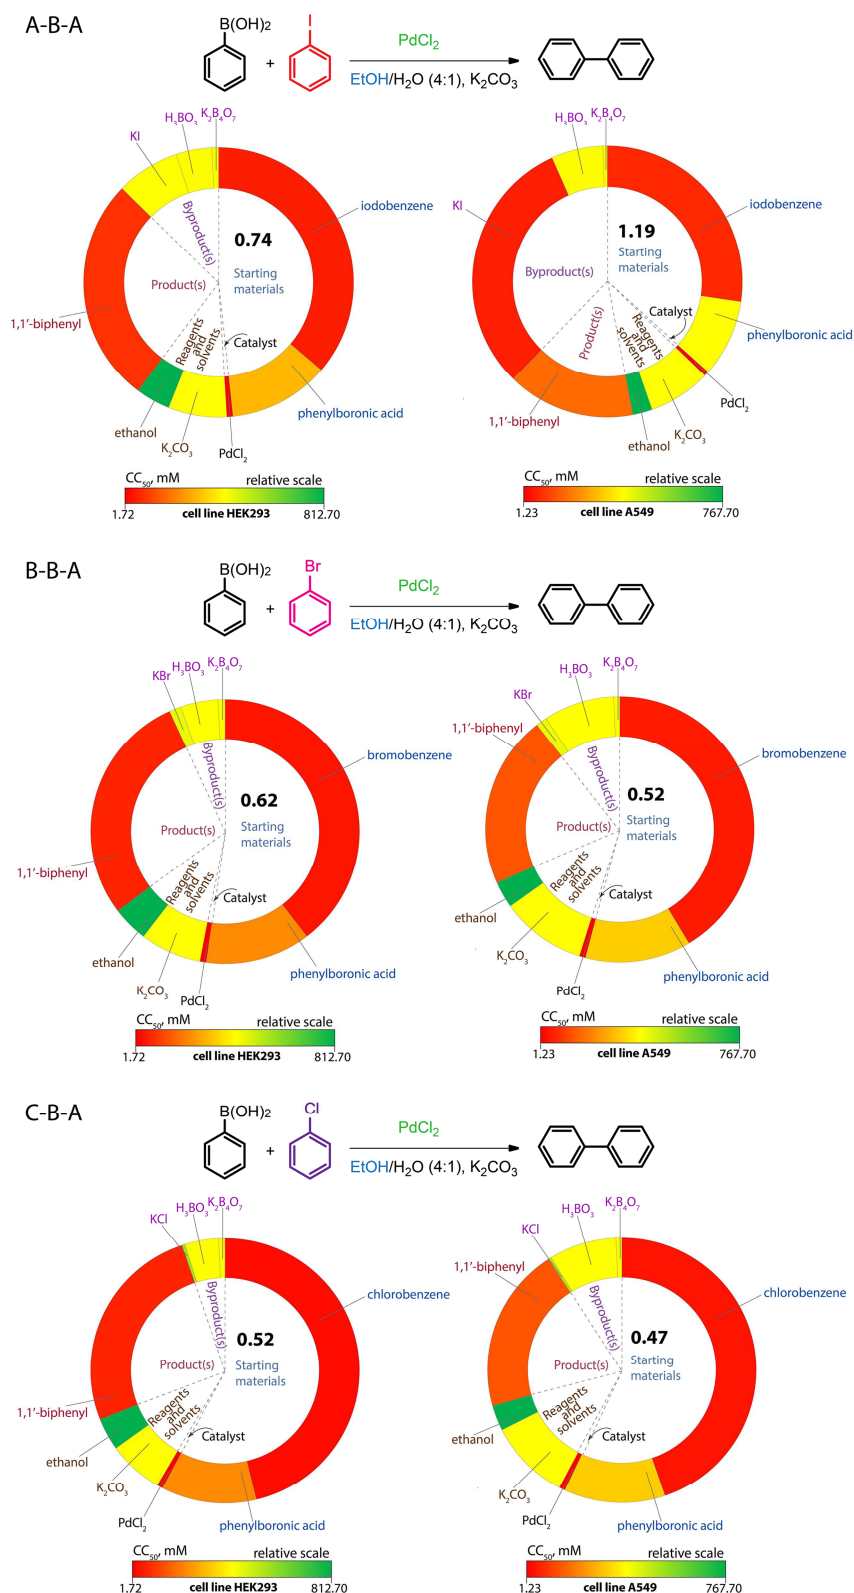

**Fig. S9.** Bio-Profiles for routes of synthesis of 1,1'-biphenyl with various starting materials. The first, second and third letters in the reaction names correspond to the type of starting material (iodobenzene (A), bromobenzene (B), chlorobenzene (C)), catalyst (in this case, PdCl<sub>2</sub> (B)), and solvent (in this case, ethanol (A)). The area of the sectors in the diagrams corresponds to the “normalized cytotoxicity” (NC) of the compounds. The color of the sectors corresponds to the actual values of CC<sub>50</sub> of the substances in a given cell line (see the relative cytotoxicity scales under the diagrams; the least toxic substance is shown in green, the most toxic is in red, and the other substances are of intermediate shades of red, orange and yellow). The calculated bio-Factors are shown inside the diagrams. See Table S6 for details.

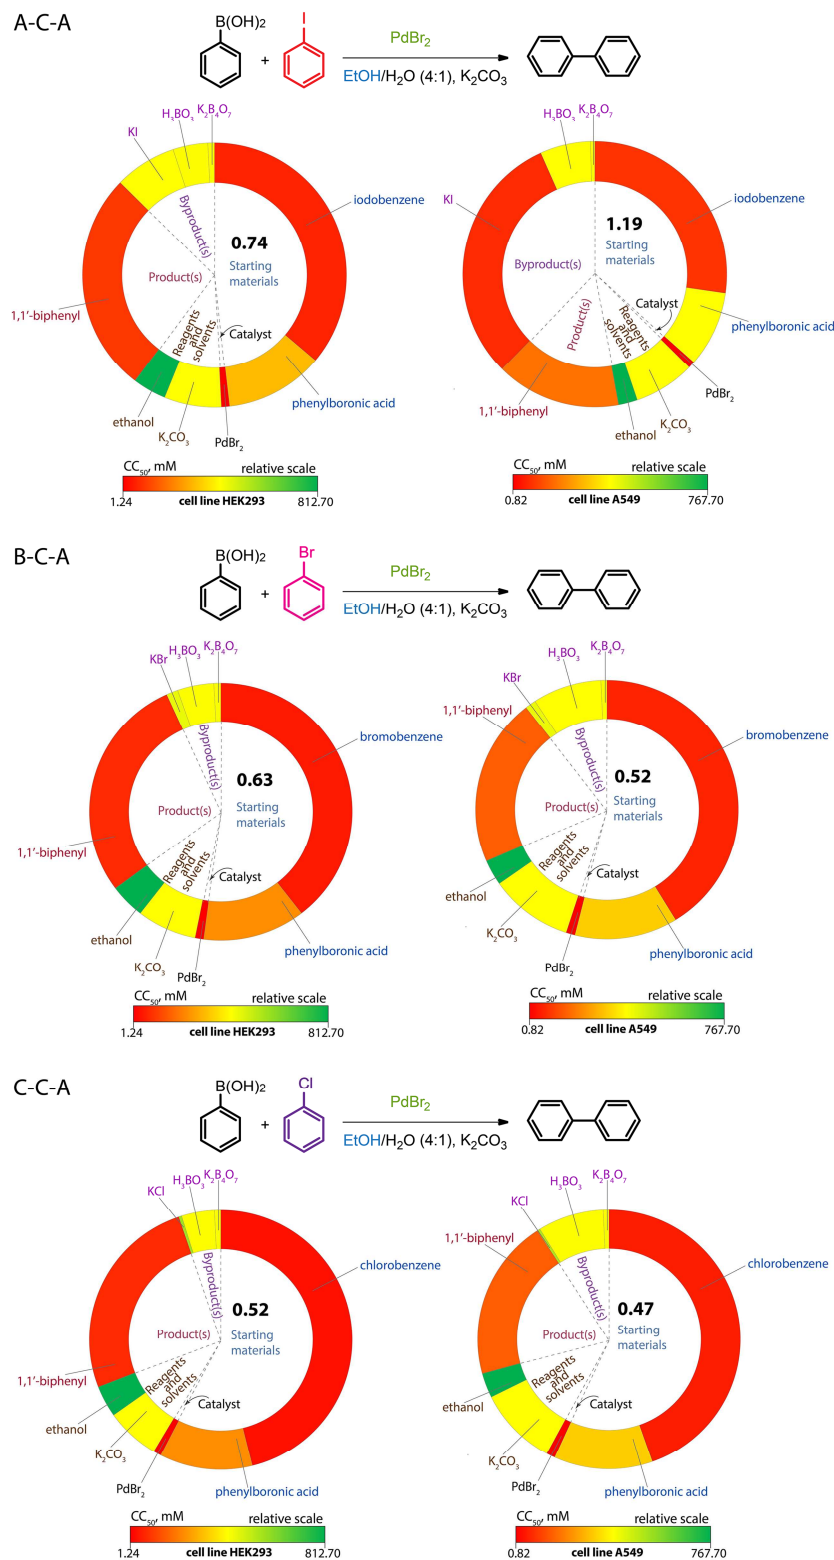

**Fig. S10.** Bio-Profiles for routes of synthesis of 1,1'-biphenyl with various starting materials. The first, second and third letters in the reaction names correspond to the type of starting material (iodobenzene (A), bromobenzene (B), chlorobenzene (C)), catalyst (in this case, PdBr<sub>2</sub> (C)), and solvent (in this case, ethanol (A)). The area of the sectors in the diagrams corresponds to the “normalized cytotoxicity” (NC) of the compounds. The color of the sectors corresponds to the actual values of CC<sub>50</sub> of the substances in a given cell line (see the relative cytotoxicity scales under the diagrams; the least toxic substance is shown in green, the most toxic is in red, and the other substances are of intermediate shades of red, orange and yellow). The calculated bio-Factors are shown inside the diagrams. See Table S6 for details.



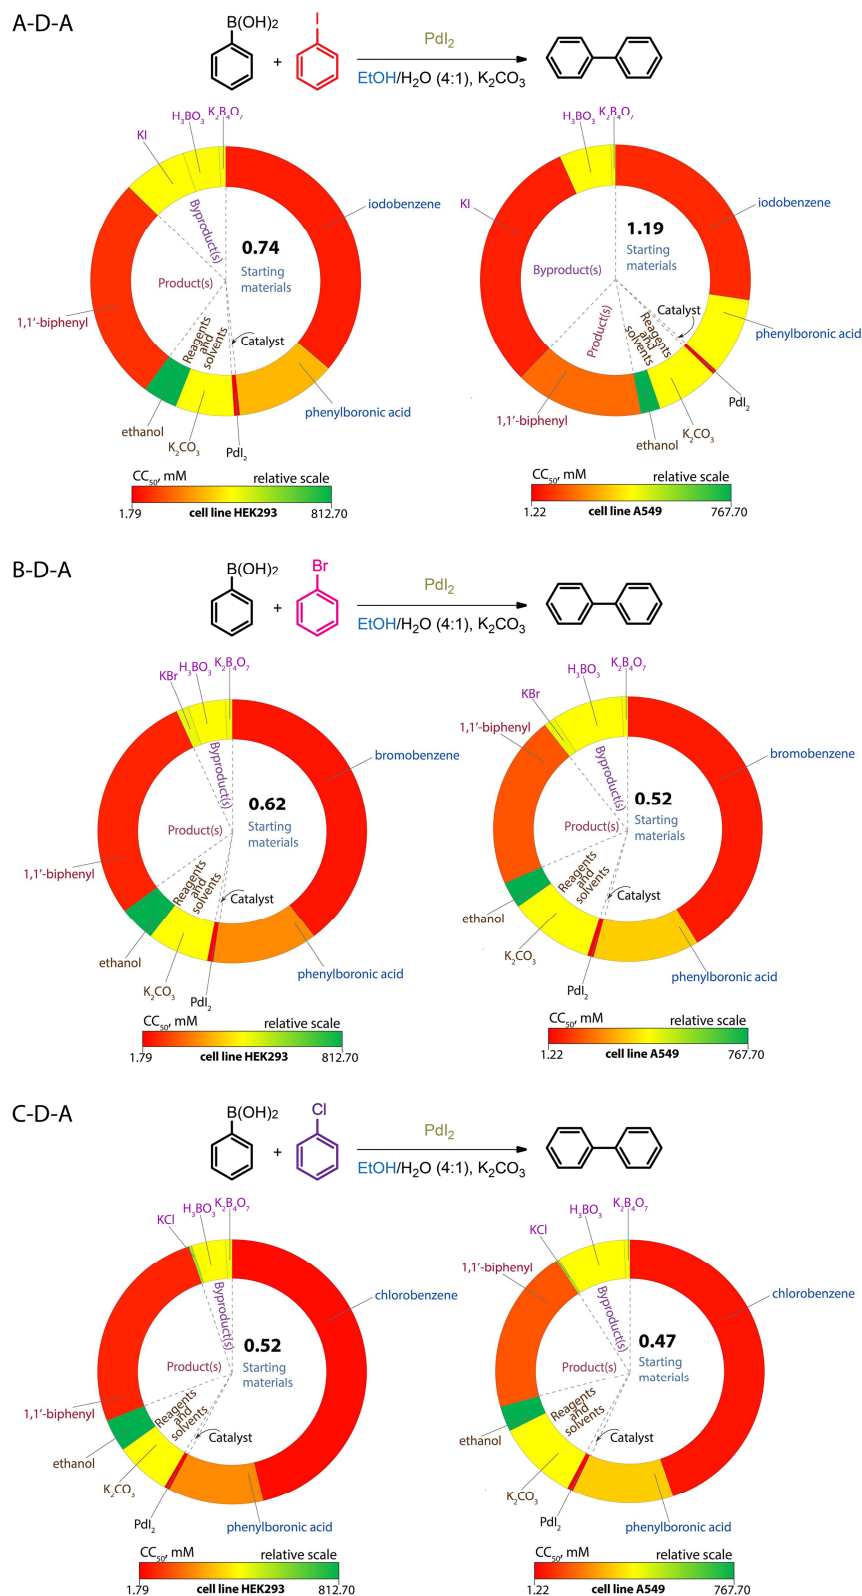

**Fig. S11.** Bio-Profiles for routes of synthesis of 1,1'-biphenyl with various starting materials. The first, second and third letters in the reaction names correspond to the type of starting material (iodobenzene (A), bromobenzene (B), chlorobenzene (C)), catalyst (in this case, PdI<sub>2</sub> (D)), and solvent (in this case, ethanol (A)). The area of the sectors in the diagrams corresponds to the “normalized cytotoxicity” (NC) of the compounds. The color of the sectors corresponds to the actual values of CC<sub>50</sub> of the substances in a given cell line (see the relative cytotoxicity scales under the diagrams; the least toxic substance is shown in green, the most toxic is in red, and the other substances are of intermediate shades of red, orange and yellow). The calculated bio-Factors are shown inside the diagrams. See Table S6 for details.

A-C-A

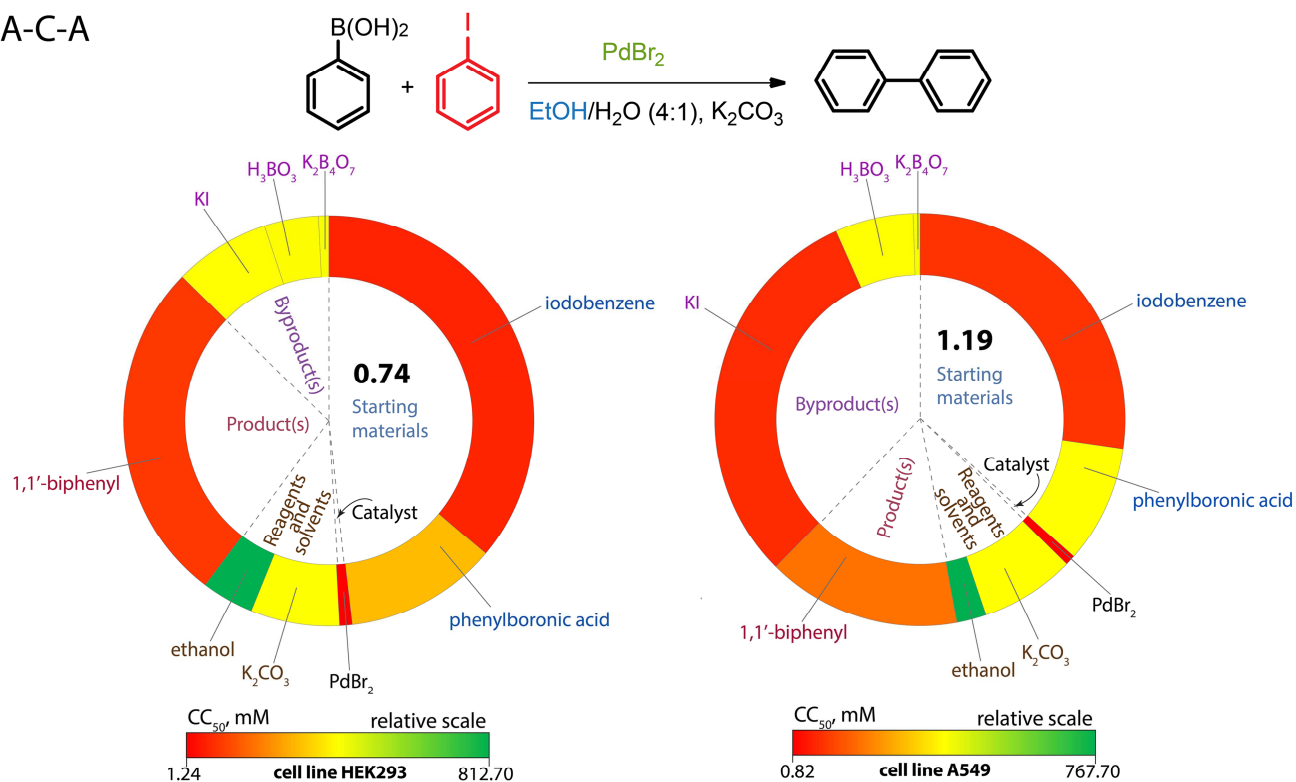

A-C-B

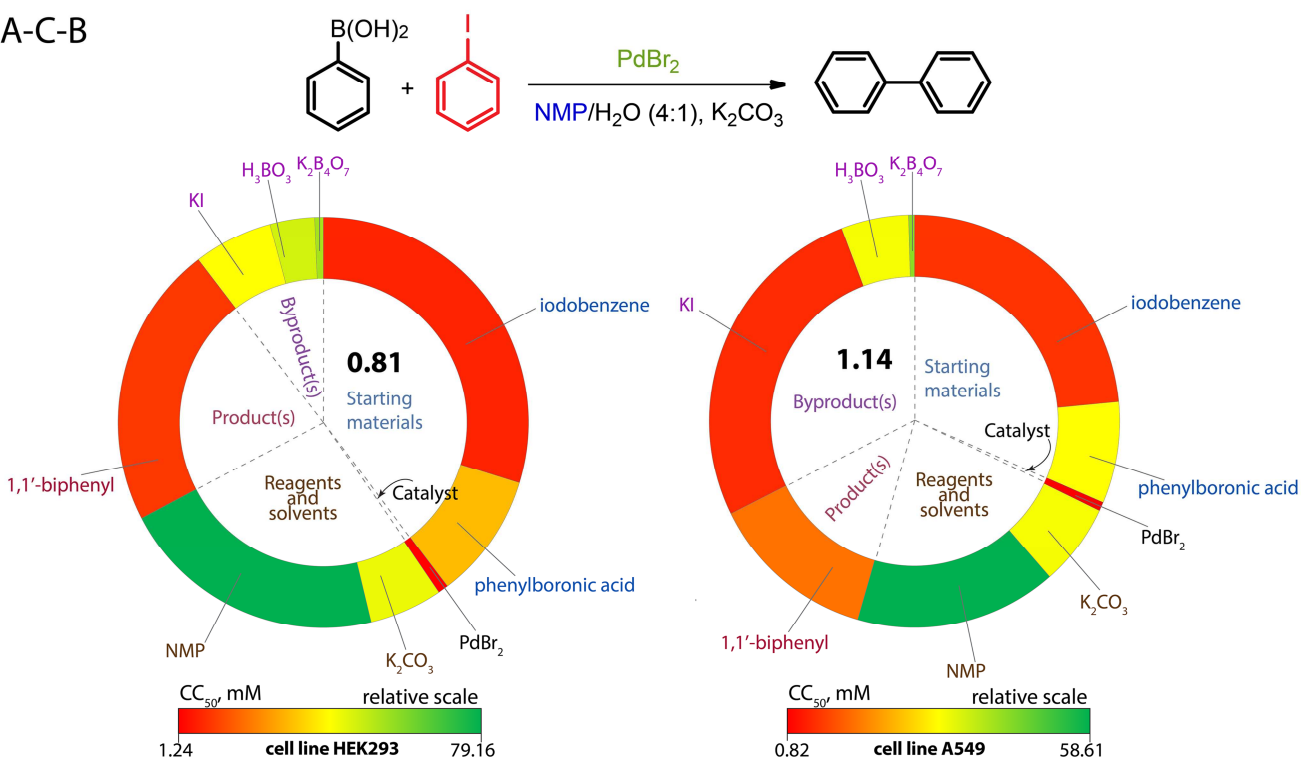

**Fig. S12.** Bio-Profiles for routes of synthesis of 1,1'-biphenyl with various solvents. The first, second and third letters in the reaction names correspond to the type of starting material (in this case, iodobenzene (A), catalyst (in this case, PdBr<sub>2</sub> (C)), and solvent (ethanol (A) or *N*-methylpyrrolidone (B)). The area of the sectors in the diagrams corresponds to the “normalized cytotoxicity” (NC) of the compounds. The color of the sectors corresponds to the actual values of CC<sub>50</sub> of the substances in a given cell line (see the relative cytotoxicity scales under the diagrams; the least toxic substance is shown in green, the most toxic is in red, and the other substances are of intermediate shades of red, orange and yellow). The calculated bio-Factors are shown inside the diagrams. See Table S6 for details.

A-D-A

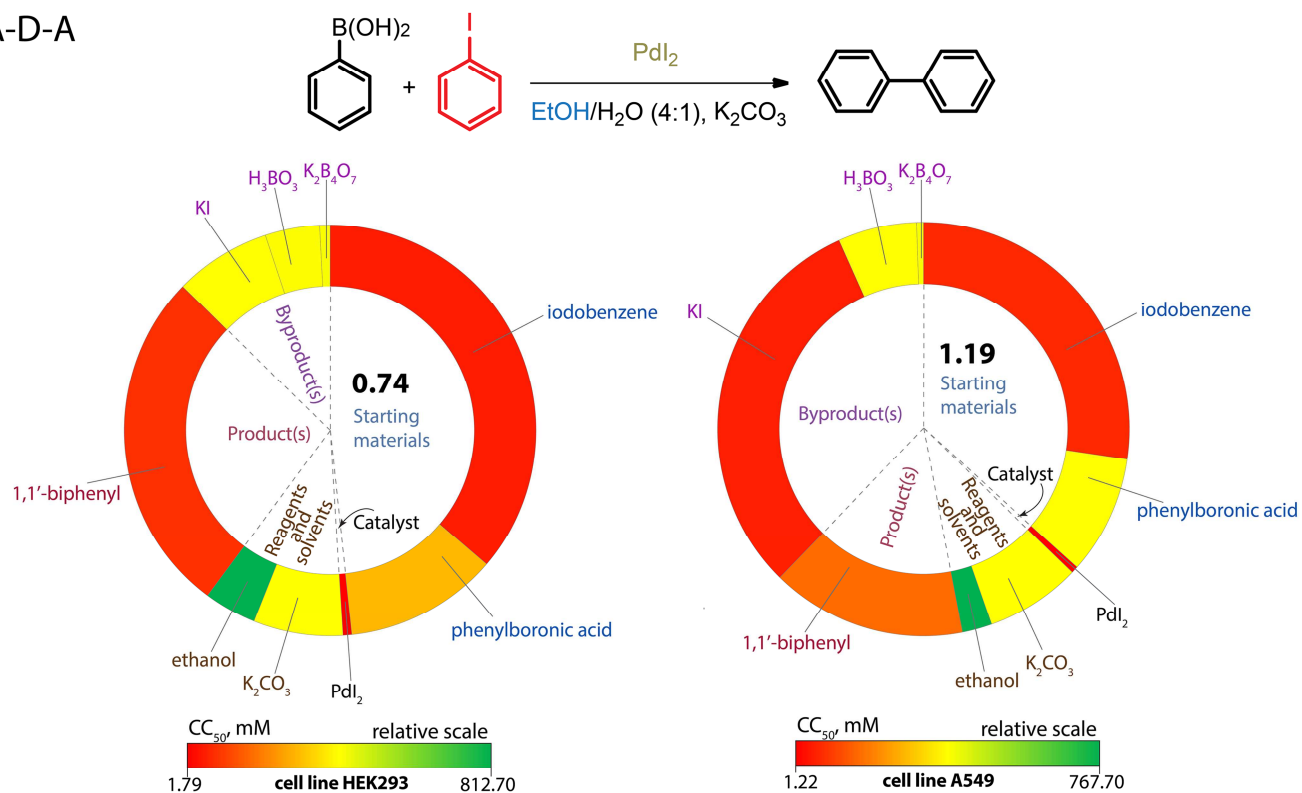

A-D-B

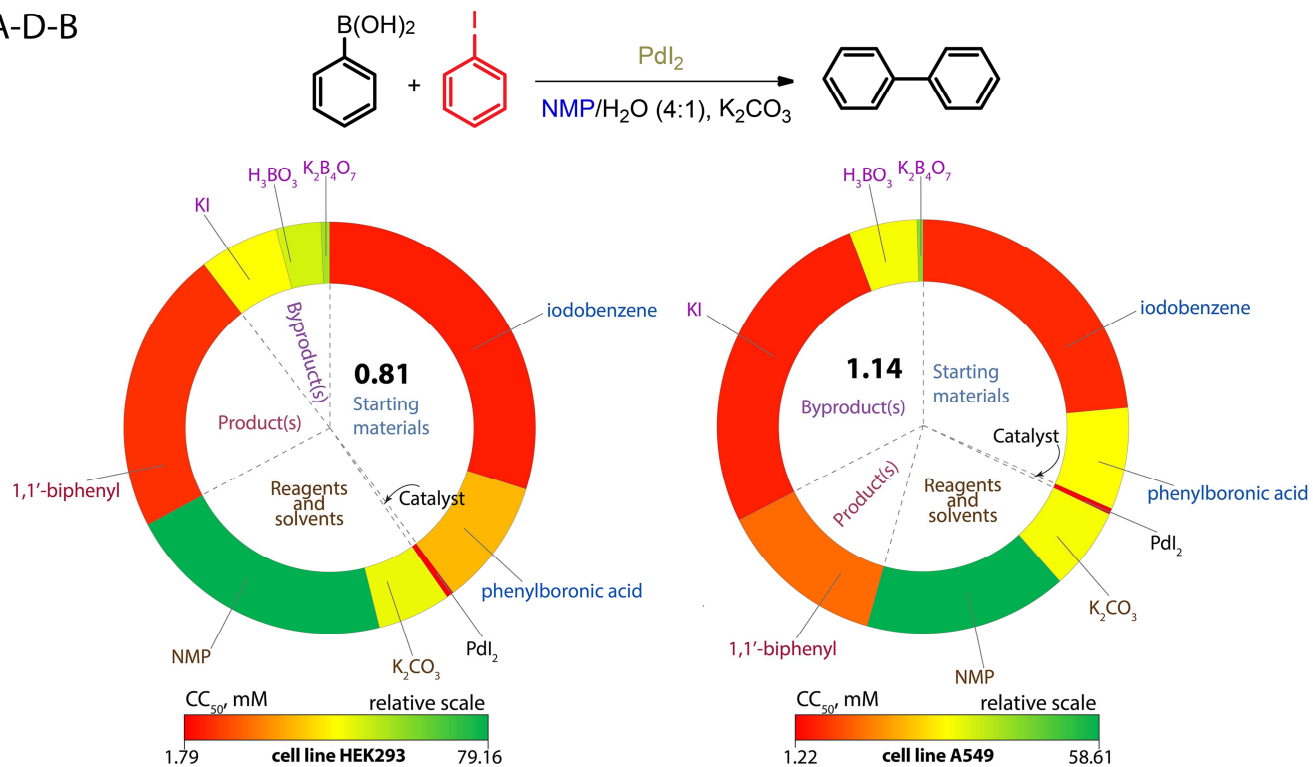

**Fig. S13.** Bio-Profiles for routes of synthesis of 1,1'-biphenyl with various solvents. The first, second and third letters in the reaction names correspond to the type of starting material (in this case, iodobenzene (A), catalyst (in this case, PdI<sub>2</sub> (D)), and solvent (ethanol (A) or *N*-methylpyrrolidone (B)). The area of the sectors in the diagrams corresponds to the “normalized cytotoxicity” (NC) of the compounds. The color of the sectors corresponds to the actual values of CC<sub>50</sub> of the substances in a given cell line (see the relative cytotoxicity scales under the diagrams; the least toxic substance is shown in green, the most toxic is in red, and the other substances are of intermediate shades of red, orange and yellow). The calculated bio-Factors are shown inside the diagrams. See Table S6 for details.

B-C-A

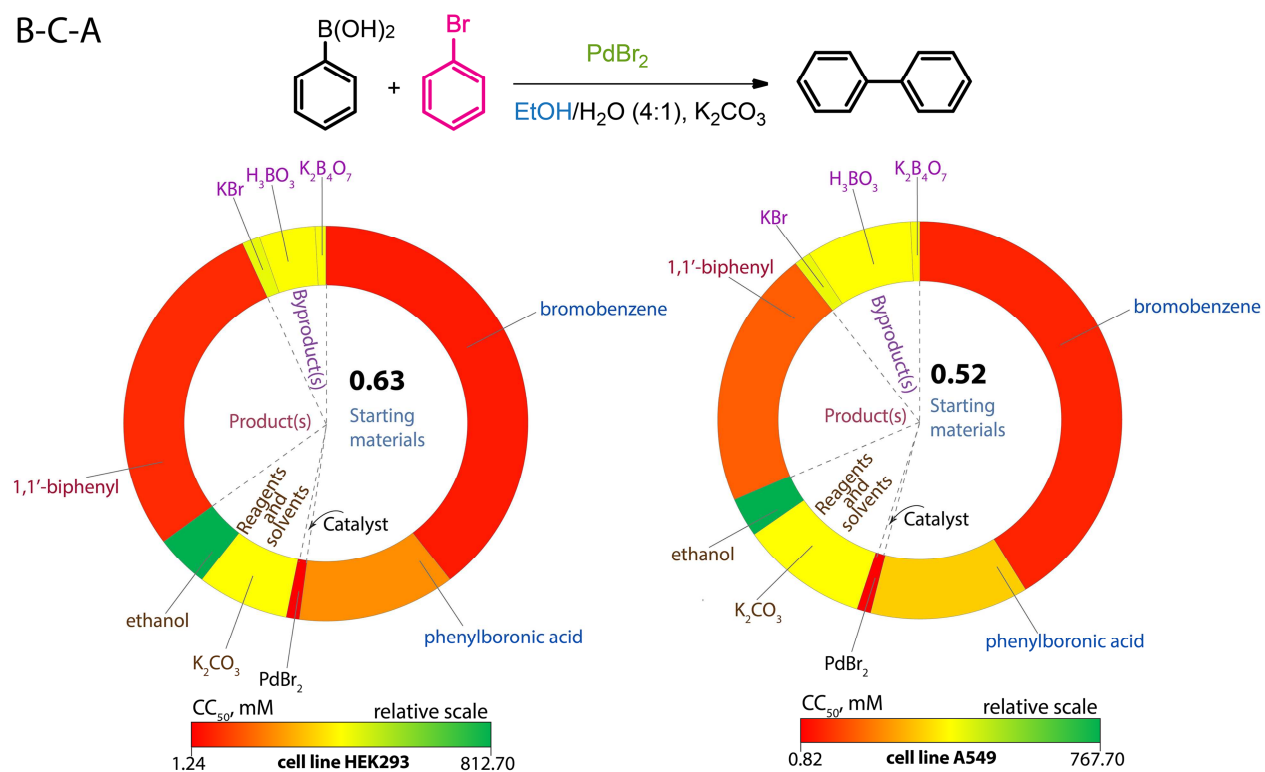

B-C-B

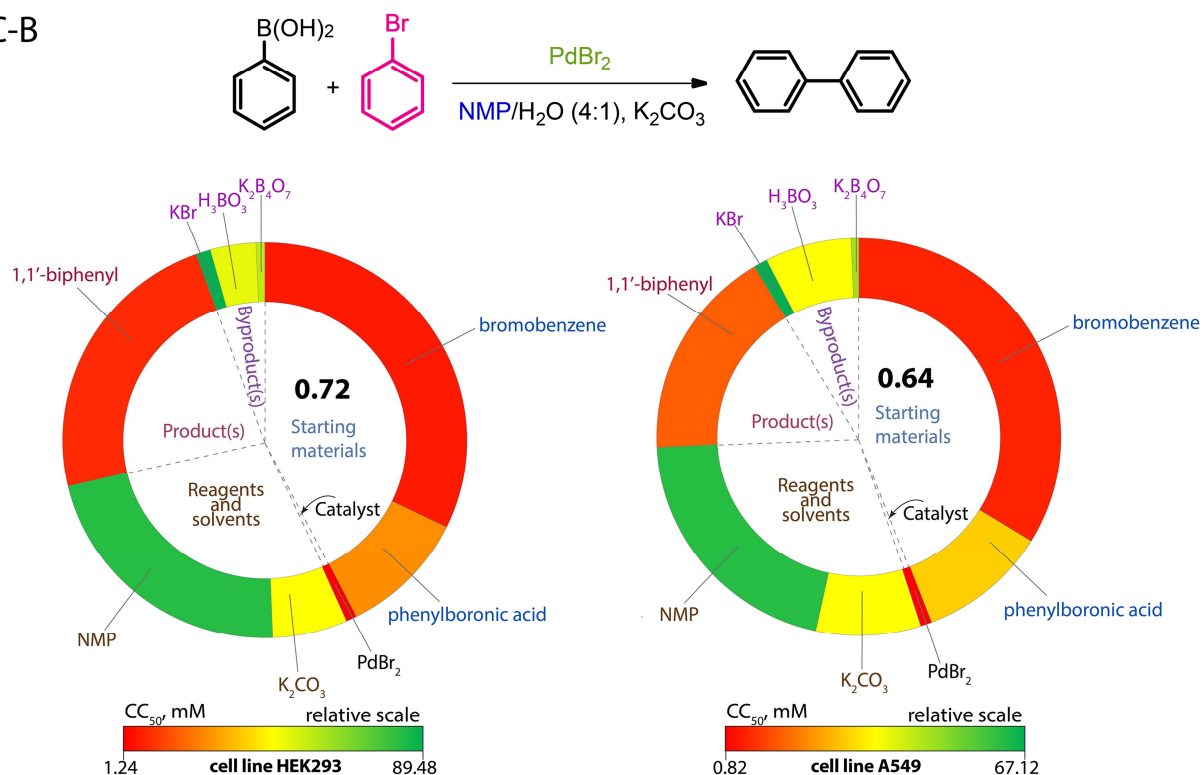

**Fig. S14.** Bio-Profiles for routes of synthesis of 1,1'-biphenyl with various solvents. The first, second and third letters in the reaction names correspond to the type of starting material (in this case, bromobenzene (B), catalyst (in this case, PdBr<sub>2</sub> (C)), and solvent (ethanol (A) or *N*-methylpyrrolidone (B)). The area of the sectors in the diagrams corresponds to the “normalized cytotoxicity” (NC) of the compounds. The color of the sectors corresponds to the actual values of CC<sub>50</sub> of the substances in a given cell line (see the relative cytotoxicity scales under the diagrams; the least toxic substance is shown in green, the most toxic is in red, and the other substances are of intermediate shades of red, orange and yellow). The calculated bio-Factors are shown inside the diagrams. See Table S6 for details.

B-D-A

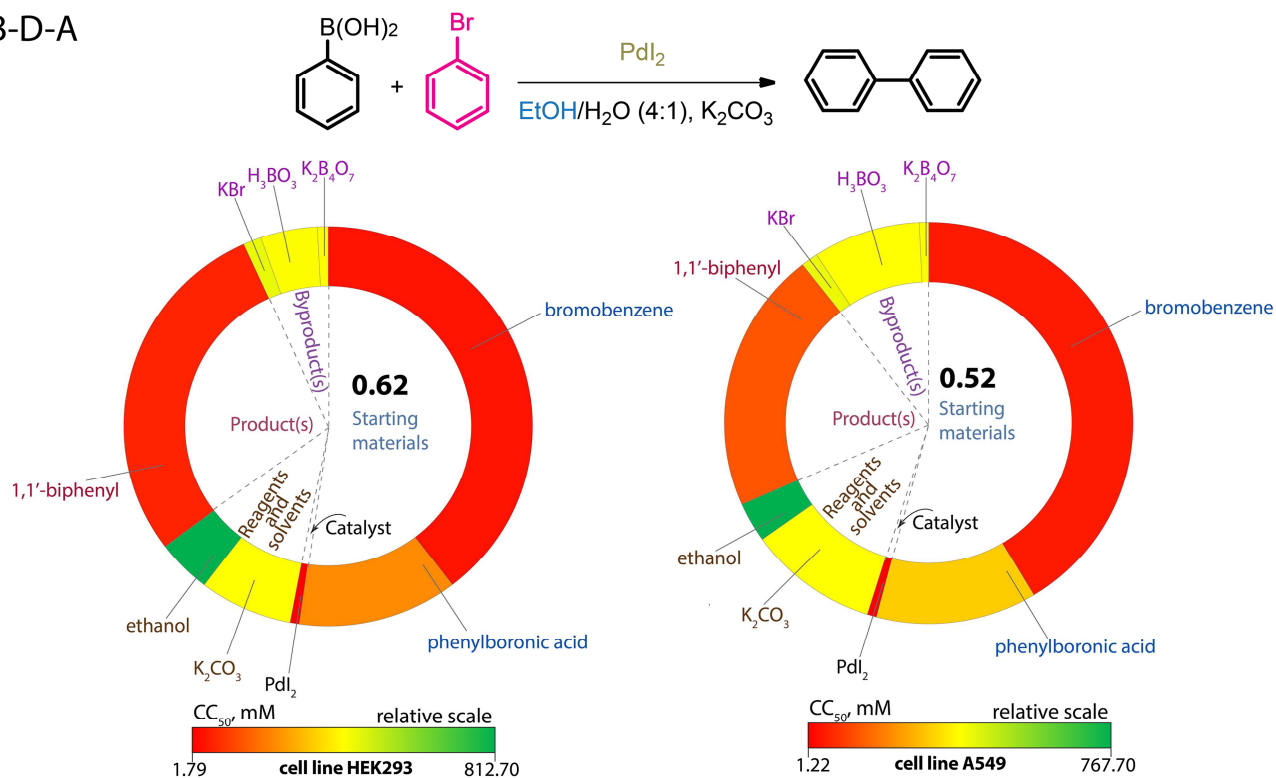

B-D-B

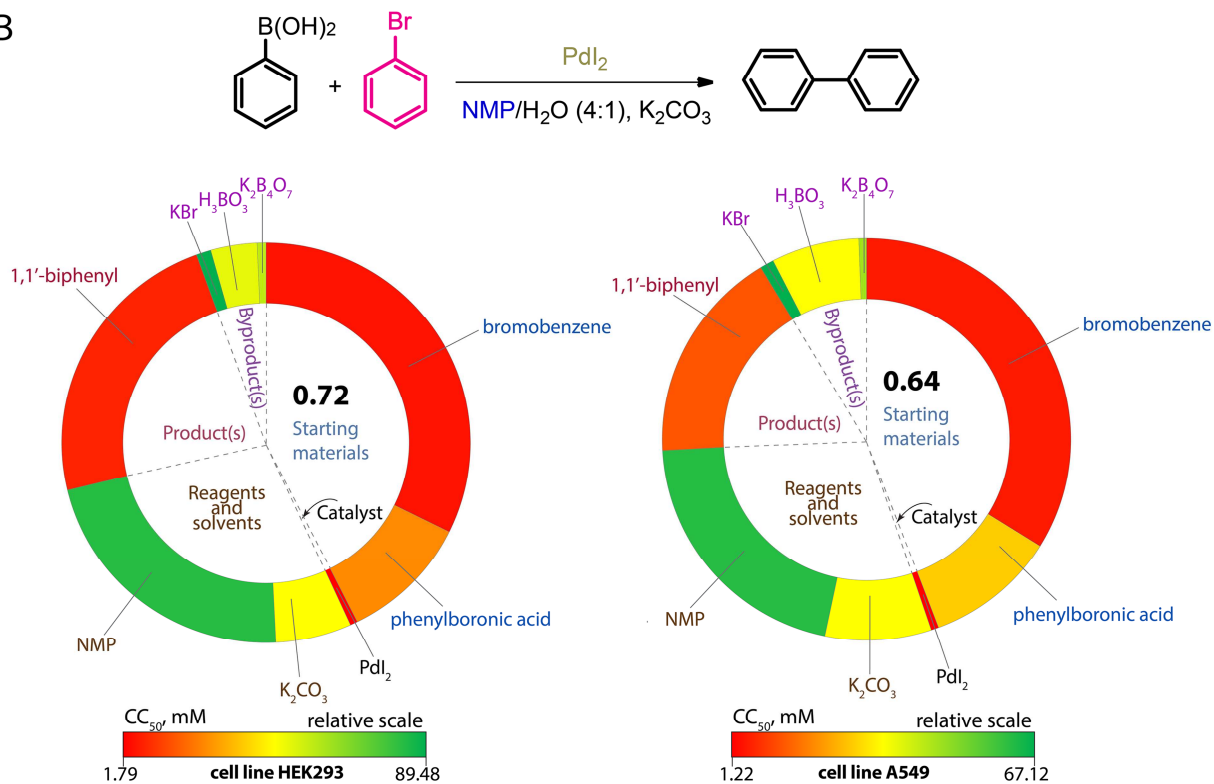

**Fig. S15.** Bio-Profiles for routes of synthesis of 1,1'-biphenyl with various solvents. The first, second and third letters in the reaction names correspond to the type of starting material (in this case, bromobenzene (B), catalyst (in this case, PdI<sub>2</sub> (D)), and solvent (ethanol (A) or *N*-methylpyrrolidone (B)). The area of the sectors in the diagrams corresponds to the “normalized cytotoxicity” (NC) of the compounds. The color of the sectors corresponds to the actual values of CC<sub>50</sub> of the substances in a given cell line (see the relative cytotoxicity scales under the diagrams; the least toxic substance is shown in green, the most toxic is in red, and the other substances are of intermediate shades of red, orange and yellow). The calculated bio-Factors are shown inside the diagrams. See Table S6 for details.

C-C-A

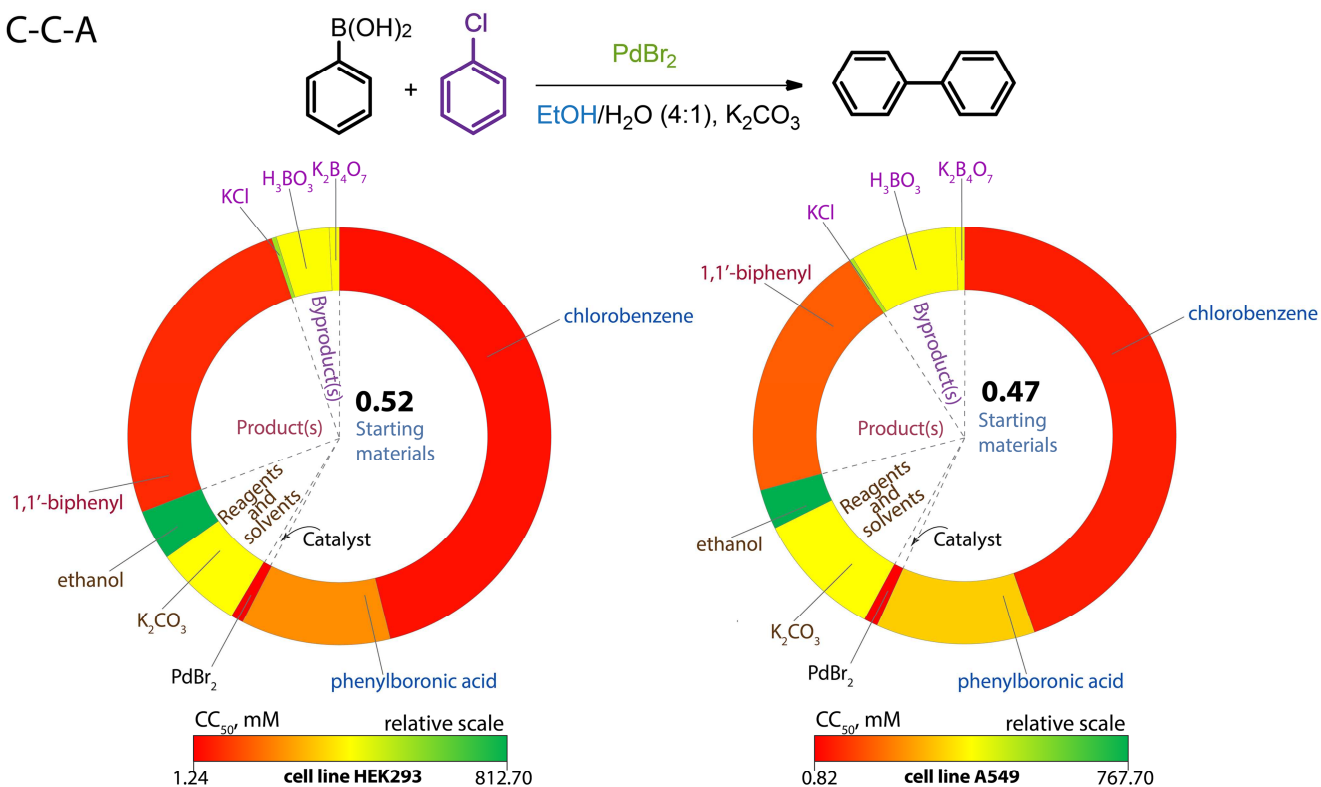

C-C-B

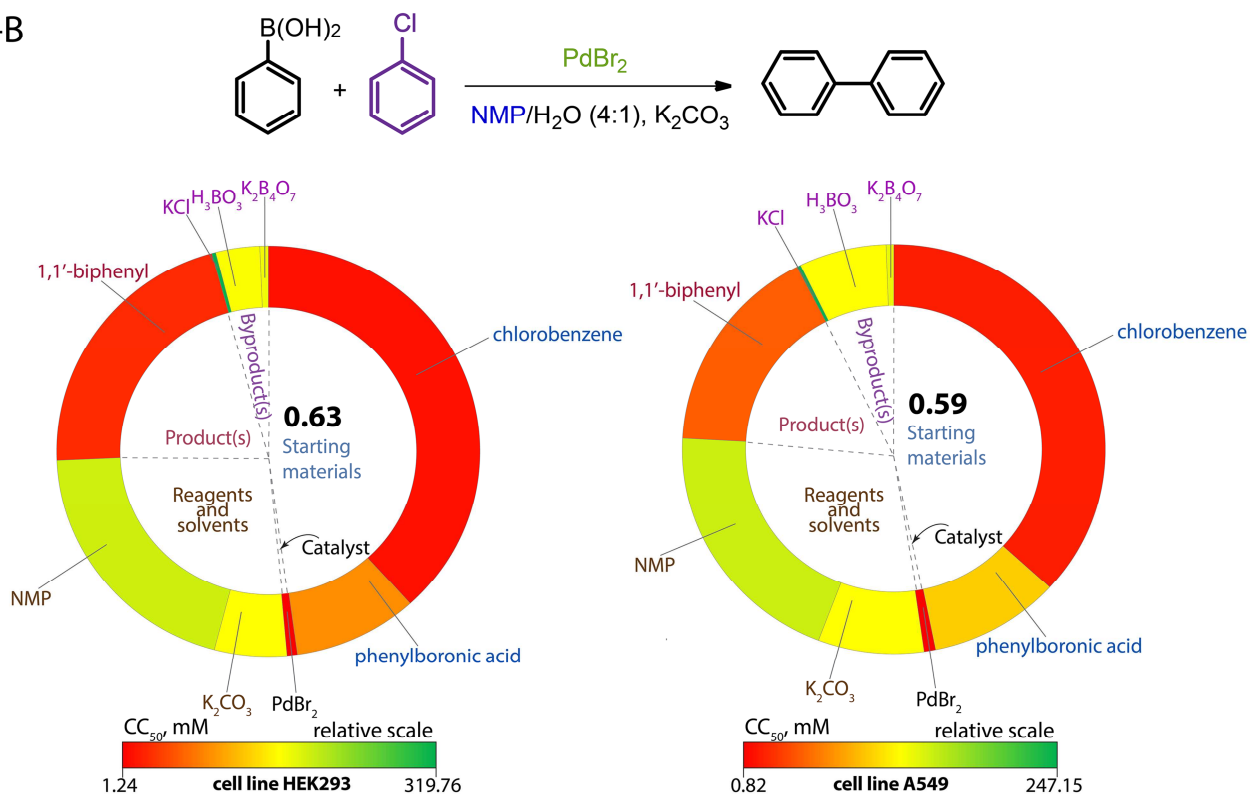

**Fig. S16.** Bio-Profiles for routes of synthesis of 1,1'-biphenyl with various solvents. The first, second and third letters in the reaction names correspond to the type of starting material (in this case, chlorobenzene (C), catalyst (in this case, PdBr<sub>2</sub> (C)), and solvent (ethanol (A) or *N*-methylpyrrolidone (B)). The area of the sectors in the diagrams corresponds to the “normalized cytotoxicity” (NC) of the compounds. The color of the sectors corresponds to the actual values of CC<sub>50</sub> of the substances in a given cell line (see the relative cytotoxicity scales under the diagrams; the least toxic substance is shown in green, the most toxic is in red, and the other substances are of intermediate shades of red, orange and yellow). The calculated bio-Factors are shown inside the diagrams. See Table S6 for details.

C-D-A

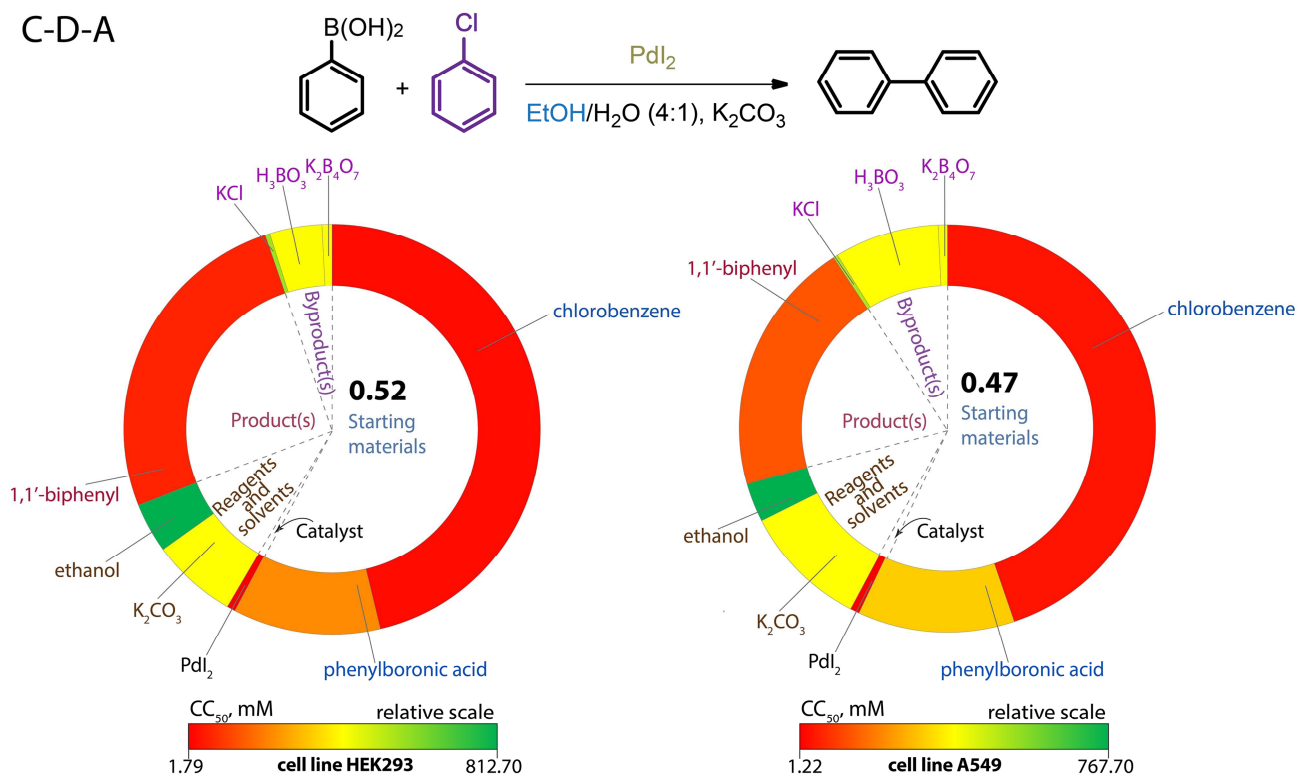

C-D-B

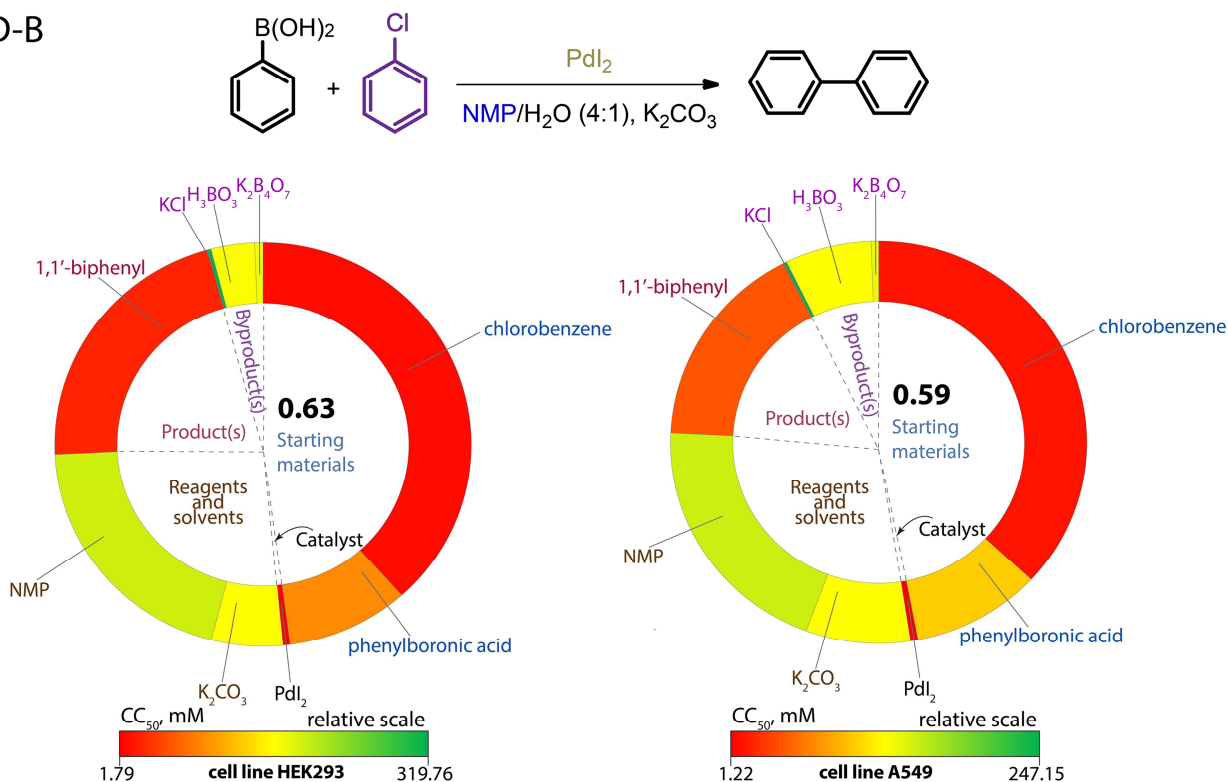

**Fig. S17.** Bio-Profiles for routes of synthesis of 1,1'-biphenyl with various solvents. The first, second and third letters in the reaction names correspond to the type of starting material (in this case, chlorobenzene (C), catalyst (in this case, PdCl<sub>2</sub> (D)), and solvent (ethanol (A) or *N*-methylpyrrolidone (B)). The area of the sectors in the diagrams corresponds to the “normalized cytotoxicity” (NC) of the compounds. The color of the sectors corresponds to the actual values of CC<sub>50</sub> of the substances in a given cell line (see the relative cytotoxicity scales under the diagrams; the least toxic substance is shown in green, the most toxic is in red, and the other substances are of intermediate shades of red, orange and yellow). The calculated bio-Factors are shown inside the diagrams. See Table S6 for details.

## References

1. K. S. Egorova, A. S. Galushko and V. P. Ananikov, *Angew. Chem. Int. Ed.*, 2020, **59**, 22296-22305.
